# Replication of the diathesis-stress model for depression in Generation Scotland.

Running title: **The diathesis-stress model for depression in Generation Scotland.**

Aleix Arnau-Soler<sup>1</sup>, Mark J. Adams<sup>2</sup>, Toni-Kim Clarke<sup>2</sup>, Donald J. MacIntyre<sup>2</sup>, Keith Milburn<sup>3</sup>, Lauren Navrady<sup>2</sup>, Generation Scotland<sup>4</sup>, Major Depressive Disorder Working Group of the Psychiatric Genomics Consortium<sup>5</sup>, Caroline Hayward<sup>6</sup>, Andrew McIntosh<sup>2,7</sup>, Pippa A. Thomson<sup>1,7</sup>

<sup>1</sup> Medical Genetics Section, University of Edinburgh, Centre for Genomic and Experimental Medicine and MRC Institute of Genetics and Molecular Medicine, Edinburgh, UK.

<sup>2</sup> Division of Psychiatry, Deanery of Clinical Sciences, University of Edinburgh, Royal Edinburgh Hospital, Morningside Park, Edinburgh EH10 5HF, UK.

<sup>3</sup> Health Informatics Centre, University of Dundee, UK.

<sup>4</sup> A collaboration between the University Medical School and NHS in Aberdeen, Dundee, Edinburgh and Glasgow, Scotland, UK.

<sup>5</sup> For a full list of MDD working group of the PGC investigators, see the Supplementary Material

<sup>6</sup> Medical Research Council Human Genetics Unit, Institute of Genetics and Molecular Medicine, University of Edinburgh, Edinburgh, UK.

<sup>7</sup> Centre for Cognitive Ageing and Cognitive Epidemiology, University of Edinburgh, Edinburgh, UK.

Correspondence should be addressed to: P. Thomson ([Pippa.Thomson@ed.ac.uk](mailto:Pippa.Thomson@ed.ac.uk)) or A. Arnau-Soler ([aleix.arnau.soler@igmm.ed.ac.uk](mailto:aleix.arnau.soler@igmm.ed.ac.uk))

Centre for Genomic and Experimental Medicine  
Institute of Genetics and Molecular Medicine  
University of Edinburgh  
Western General Hospital  
Crewe Road South  
Edinburgh, EH4 2XU, UK  
Phone: +44(0)1316518756

## 35 ABSTRACT

36 Depression has well-established influences from both genetic and environmental  
37 factors. A popular theory of depression aetiology in psychiatry and psychology is the  
38 *diathesis-stress* theory, which assumes a multiplicative gene-by-environment  
39 interaction (GxE) effect on risk. Recently, *Colodro-Conde et al* empirically tested it,  
40 reporting GxE effects additively contributing to liability.

41 We replicate that study on an independent sample of 4 919 unrelated individuals who  
42 reported stressful life events (SLE) over the 6 months immediately before a self-  
43 reported measure of depressive symptoms, and test for sex-specific differences.

44 We identified significant but weak positive GxE using the total number of SLE reported  
45 in the full cohort ( $R^2 = 0.08\%$ ,  $p = 4.87 \times 10^{-2}$ ) and in women ( $R^2 = 0.19\%$ ,  $p = 1.66 \times 10^{-2}$ ), but not in men ( $p > 0.05$ ). We also detected significant GxE effects, but only in  
46 women, when SLE were split into those in which the respondent may play an active  
47 role (“dependent” SLE,  $R^2 = 0.15\%$ ,  $p = 3.85 \times 10^{-2}$ ) or a passive role (“independent”  
48 SLE,  $R^2 = 0.16\%$ ,  $p = 3.32 \times 10^{-2}$ ). Further, in women who experienced no SLE, the  
49 *diathesis* effect showed a protective effect ( $\beta = -0.061$ , s.e. = 0.029,  $p = 0.037$ ),  
50 suggesting a possible role of genetic plasticity in risk variants.

51 Our study replicates Colodro-Conde *et al.*, reinforcing the presence of additional risk in  
52 the aetiology of depression due to GxE effects. Furthermore, these results support  
53 possible differences between sexes and effects of SLE subtypes. However, more power  
54 is required to robustly replicate these findings.

56

## 57 INTRODUCTION

58 Adversity faced during stressful life events (SLE) has been consistently recognized as a  
 59 determinant of depressive symptoms with many studies reporting significant  
 60 associations between SLE and major depressive disorder (MDD)<sup>1-7</sup>. Some studies  
 61 suggest that severe adversity is present before the onset of illness in over 50% of  
 62 individuals with depression<sup>8</sup> and may characterize a subtype of cases<sup>9</sup>. However, some  
 63 individuals facing severe stress never present symptoms of depression<sup>10</sup>. This has led  
 64 to a proposal that interaction between stress and an individual's vulnerability, or  
 65 *diathesis*, is a key element in the development of depressive symptoms. Such  
 66 vulnerability can be conceived as a set of biological factors that predispose to illness.  
 67 This idea was first conceptualized into the *diathesis-stress* model to explain the  
 68 development of schizophrenia back in the 1960s<sup>11</sup>. Later in the 1980s it was used to  
 69 explain the origins of depression<sup>12-14</sup> and since then several *diathesis-stress* models  
 70 have been applied to many psychopathologies<sup>15-19</sup>. The *diathesis-stress* model  
 71 proposes that a latent *diathesis* may be activated by stress before psychopathological  
 72 symptoms manifest. Some levels of *diathesis* to illness are present in everybody, with a  
 73 threshold over of which they will present symptoms. Exceeding such illness threshold  
 74 depends on the interaction between *diathesis* and the degree of adversity faced in SLE,  
 75 which increase the liability of depression beyond the combined additive effects  
 76 alone<sup>15</sup>. Inherent genetic risk factors can be conceived as a genetic *diathesis*. Thus, this  
 77 genetically driven effect produced by the *diathesis-stress* interaction can be seen as a  
 78 gene-by-environment interaction (GxE).  
 79 MDD is characterized by a highly polygenic architecture composed of common variants  
 80 with small effect and/or rare variants<sup>20</sup>. Therefore, GxE interactions in depression are

81 also expected to be highly polygenic. In recent years, with the increasing success of  
 82 GWAS, GxE studies in depression have shifted towards hypothesis-free genome-wide  
 83 and polygenic approaches that capture liability to depression using molecular data<sup>21-29</sup>.  
 84 Recent advances in genomics and the massive effort from national institutions to  
 85 collect genetic, clinical and environmental data on large population-based samples  
 86 now provide an opportunity to empirically test the *diathesis-stress* model in  
 87 depression. A novel paradigm to quantify genetic *diathesis* into a single genetic  
 88 measure, to study GxE effects with more predictive power than any single variant, is  
 89 the construction of polygenic risk scores (PRS)<sup>30-33</sup>. PRS are genetic indicators of the  
 90 aggregate effect from risk alleles carried by an individual weighted by their allelic  
 91 effect estimated from Genome-Wide Association Studies (GWAS).

92 This polygenic approach to assess the *diathesis-stress* model for depression has been  
 93 tested with childhood trauma<sup>21,23,29</sup> and SLE<sup>22,27,29</sup>, as measures of environmental  
 94 adversity.

95 Recently, Colodro-Conde *et al.*<sup>27</sup> provided a direct test of the *diathesis-stress* model for  
 96 recent SLE and depressive symptoms. In this study, Colodro-Conde *et al.* used PRS  
 97 weighted by the most recent genome-wide meta-analysis conducted by the Psychiatric  
 98 Genetics Consortium (PGC; N = 159 601), having a substantially larger sample size than  
 99 any discovery sample used previously, and measures of three environmental  
 100 exposures: lack of social support, “personal” SLE (PSLE), and “network” SLE. Colodro-  
 101 Conde *et al.* reported a significant additive risk on liability to depression due to a GxE  
 102 effect in individuals who combine a high genetic predisposition to MDD and a high  
 103 number of reported PSLE, mainly driven by effects in women. No significant interaction  
 104 was reported in males. They found no significant interaction with “network” SLE or

105 social support. They concluded that the effect of stress on risk of depression was  
 106 dependent on an individual's *diathesis*, supporting the *diathesis-stress* theory. In  
 107 addition, they suggested possible sex-specific differences in the aetiology of  
 108 depression. However, Colodro-Conde *et al.* findings have not, to our knowledge, been  
 109 independently replicated.

110 In the present study we aim to replicate Colodro-Conde *et al.* and assess differences  
 111 between women and men in an independent sample of 4 919 unrelated white British  
 112 participants from a further longitudinal assessment from Generation Scotland: Scottish  
 113 Family Health Study, who along with a self-reported diagnosis of depressive  
 114 symptoms, self-reported SLE over the preceding 6 months.

# 115 MATERIALS AND METHODS

## 116 Sample description

117 The present study was conducted using data available on 4 919 unrelated individuals  
118 (mean age at questionnaire: 47.2, s.d. = 12.2, range 22-95; *females*:  $n = 2\,990$  - 60.8%,  
119 mean age 56.1, s.d. = 12.4; *males*:  $n = 1\,929$  - 39.2%, mean age 58.7, s.d. = 11.8) from a  
120 further longitudinal assessment from Generation Scotland: Scottish Family Health  
121 Study (GS:SFHS; [www.ed.ac.uk/generation-scotland/using-resources/scottish-family-](http://www.ed.ac.uk/generation-scotland/using-resources/scottish-family-health-study)  
122 [health-study](http://www.ed.ac.uk/generation-scotland/using-resources/scottish-family-health-study)) funded by a Wellcome Trust Strategic Award “STratifying Resilience and  
123 Depression Longitudinally” (STRADL) reference 10436/Z/14/Z. STRADL<sup>34</sup> is a project  
124 aimed to investigate the aetiology underlying depression by re-contacting participants  
125 from GS:SFHS to collect new and updated mental health questionnaires covering a  
126 wide range of psychiatric symptoms and SLE measures, among others. Further details  
127 on the recruitment procedure and GS:SFHS profile are described in detail elsewhere<sup>35-</sup>  
128 <sup>39</sup>. In 2014, 21 525 GS:SFHS participants eligible for re-contact were sent self-reported  
129 questionnaires. 9 618 GS:SFHS re-contacted participants (44.7% response rate) agreed  
130 to provide new measures to STRADL mental health follow-up<sup>34</sup>. Those participants:  
131 duplicated, with diagnoses of bipolar disorder or with missing data on reported SLE,  
132 population outliers, with sex discrepancies, or with more than 2% missing genotypes,  
133 were removed. SNPs with more than 2% genotype missingness, Hardy-Weinberg  
134 Equilibrium test  $p < 1 \times 10^{-6}$ , or minor allele frequency lower than 1%, were excluded.  
135 After applying quality control, individuals were filtered by degree of relatedness ( $\pi$ -hat  
136  $< 0.05$ ) using PLINK v1.9<sup>40</sup>, maximizing retention of those participants reporting higher  
137 numbers of SLE (see phenotype assessment below). The final dataset comprised 4 919  
138 unrelated individuals and 560 351 SNPs after quality control. 20 principal components

were calculated for the final “full cohort” dataset (N = 4 919), “females” dataset (N = 2 990) and “males” dataset (N = 1 929). All participants provided written consent. All components of GS:SFHS and STRADL obtained ethical approval from the Tayside Committee on Medical Research Ethics on behalf of the National Health Service (reference 05/s1401/89). GS:SFHS & STRADL data is available to researchers on application to the Generation Scotland Access Committee ([access@generationscotland.org](mailto:access@generationscotland.org)).

### **Phenotype assessment**

Individual’s current depressive symptoms were assessed using the 28-item scaled version of The General Health Questionnaire (GHQ)<sup>41,42</sup>. GHQ is a reliable and validated psychometric screening tool to detect common psychiatric and non-psychotic conditions (GHQ Cronbach alpha coefficient: 0.82 – 0.86)<sup>43</sup>. GHQ assesses symptoms over the last two weeks through 28 yes/no questions (items). At same time, each symptom/item is rated on a four-point Likert scale from 0 to 3 to assess its degree or severity (e.g. *Have you recently felt that life is entirely hopeless?* “Not at all”, “No more than usual”, “Rather more than usual”, “Much more than usual”), resulting on an 84-point scale *depression* score. *Depression* score was log transformed to reduce the effect of positive skew/provide a better approximation to a normal distribution. For a better interpretation, *depression* score was scaled to a mean of 0 when required (see Figure 3).

Data from a brief life events questionnaire (BLEQ), based on the List of Threatening Experiences (LTE)<sup>44</sup> and self-reported by STRADL participants, was used to construct a measure of common SLE over the previous 6 months. LTE is a reliable psychometric

163 device to measure psychological “stress”<sup>45,46</sup>. The BLEQ consists of a 12-item  
 164 questionnaire to assess SLE with considerable long-term contextual effects (e.g. *Over*  
 165 *last 6 months, did you have a serious problem with a close friend, neighbour or*  
 166 *relatives?*). A final score reflecting the total number of SLE (TSLE) ranging from 0 to 12  
 167 was constructed by summing yes responses. Additionally, TSLE was split into two  
 168 categories based on BLEQ-items measuring SLE in which the individual may play and  
 169 active role, and therefore in which the SLE is influenced by genetic factors and thus  
 170 subjected to be “dependent” on an individual’s own behaviour or symptoms (DSLE; 6  
 171 BLEQ-items, e.g. *a serious problem with a close friend, neighbour or relatives* may be  
 172 subject to a respondent’s own behaviour), or SLE that are not influenced by genetic  
 173 factors, likely to be “independent” on a participant’s own behaviour (ISLE; 5 BLEQ-  
 174 items, e.g. *a serious illness, injury or assault happening to a close relative* is potentially  
 175 independent of a respondent’s own behaviour)<sup>44,47</sup>. The BLEQ-item “*Did you/your wife*  
 176 *or partner give birth?*” was excluded from this categorization. In addition, for each SLE  
 177 measure, individuals were categorized in three categories based on the amount of SLE  
 178 experienced (0 SLE = “missing”, 1 or 2 SLE = “low”, and 3 or more SLE = “high”).

179

## 180 **Polygenic profiling & statistical analysis**

181 Polygenic risk scores (PRS) were generated by PRSice<sup>48</sup>, whose functionality relies  
 182 entirely in PLINK v1.9<sup>40</sup>, and calculated using the genotype data of STRADL participants  
 183 (i.e. target sample) and summary statistics for MDD from the PGC-MDD2 GWAS  
 184 release (July 2016, discovery sample) used by Colodro-Conde *et al.* with the added  
 185 contribution from QIMR cohort and the exclusion of Generation Scotland participants,



186 resulting in summary statistics for MDD derived from a sample of 50 455 cases and 105  
187 411 controls.

188 Briefly, PRSice removed strand-ambiguous SNPs and clump-based pruned ( $r^2 = 0.1$ ,  
189 within a 10Mb window) our target sample to obtain the most significant independent  
190 SNPs ( $n$ ) in approximate linkage equilibrium. Independent risk alleles were then  
191 weighted by the allelic effect sizes estimated in the independent discovery sample  
192 were aggregated into PRS. PRS were generated for eight  $p$  thresholds ( $p$  thresholds:  $< 5$   
193  $\times 10^{-8}$ ,  $< 1 \times 10^{-5}$ ,  $< 0.001$ ,  $< 0.01$ ,  $< 0.05$ ,  $< 0.1$ ,  $< 0.5$ ,  $\leq 1$ ) determined by the discovery  
194 sample. (See Supplementary Table 1 for summary of PRS).

195 Following Colodro-Conde *et al.*, covariates (i.e. age, age<sup>2</sup>, sex, age-by-sex and age<sup>2</sup>-by-  
196 sex interactions, and 20 principal components) were regressed from PRS (PRS') and SLE  
197 scores (i.e. TSLE, DSLE and ISLE; SLEs') before fitting models in GCTA 1.26.0<sup>49</sup> to guard  
198 against confounding influences on the PRS-by-SLEs interactions<sup>50</sup>. PRS' and SLEs' were  
199 standardized to a mean of 0 and a standard deviation of 1. A genetic relatedness  
200 matrix (GRM) was calculated for each dataset (i.e. *full cohort*, *males* and *females*) using  
201 GCTA.

202 Mixed linear models using the GRM were used to estimate the variance in *depression*  
203 score explained by PRS', SLEs' and their interaction, and stratified by sex.

204 The mixed linear model used to assess the effects of PRS' is as follows:

$$Depression = \beta_0 + \beta_1 PRS' + GRM + Covariates$$

205 Mixed linear models used to assess the effect of the stressors (=SLEs') are as follows:

$$Depression = \beta_0 + \beta_1 TSLE' + GRM + Covariates$$

$$Depression = \beta_0 + \beta_1 DSLE' + GRM + Covariates$$

$$Depression = \beta_0 + \beta_1 ISLE' + GRM + Covariates$$

206 The Mixed linear models (i.e. the diathesis-stress model) used to assess PRS'  
207 interactions with SLEs' are as follows:

$$Depression = \beta_0 + \beta_1 PRS' + \beta_2 TSLE' + \beta_3 PRS' \times TSLE' + GRM + Covariate \square$$

$$Depression = \beta_0 + \beta_1 PRS' + \beta_2 DSLE' + \beta_3 PRS' \times DSLE' + GRM + Covariate \square$$

$$Depression = \beta_0 + \beta_1 PRS' + \beta_2 ISLE' + \beta_3 PRS' \times ISLE' + GRM + Covariate \square$$

208 Covariates fitted in the models above were age, age<sup>2</sup>, sex, age-by-sex, age<sup>2</sup>-by-sex and  
209 20 principal components. Sex and its interactions (age-by-sex and age<sup>2</sup>-by-sex) were  
210 not included when stratifying by sex. All parameters from the models were estimated  
211 using GCTA and the significance of the effect ( $\beta$ ) from fixed effects assessed using  
212 Student's *t*-test at *p*-value threshold = 0.05.

213 Using linear regressions we applied a least squares approach to assess PRS' effects on  
214 *depression* score in each SLE category (i.e. "missing stress", "low stress" "high stress")  
215 where significant GxE were detected (significance at *p*-value < 0.05).

216

## 217 RESULTS

218 Depression PRS' significantly predicted the *depression* score in the whole sample ( $\beta =$   
219  $0.080$ , s.e. =  $0.014$ ,  $p = 7.53 \times 10^{-9}$ ) explaining 0.64% of the variance at its best  $p$   
220 threshold (= 0.1; see Figure 1a). Stratifying by sex, PRS' significantly predicted the  
221 *depression* score in both sexes, explaining 0.59% in men and 0.67% in women (*men*:  $p$ -  
222 threshold = 0.1,  $\beta = 0.077$ , s.e. =  $0.022$ ,  $p = 2.09 \times 10^{-4}$ ; *women*:  $p$ -threshold = 0.1,  $\beta =$   
223  $0.082$ , s.e. =  $0.018$ ,  $p = 4.93 \times 10^{-6}$ ; see Figure 1a). Self-reported SLE over the last 6  
224 months (TSLE, mean = 1.3 SLE), significantly predicted symptoms of depression  
225 (*depression* score) in the whole sample and stratified by sex: *full cohort*: variance  
226 explained = 4.91%,  $\beta = 0.222$ , s.e. =  $0.014$ ,  $p = 9.98 \times 10^{-59}$ ; *men*: 4.19%,  $\beta = 0.205$ , s.e. =  
227  $0.021$ ,  $p = 2.23 \times 10^{-22}$ ; *women*: 5.33%,  $\beta = 0.231$ , s.e. =  $0.018$ ,  $p = 7.48 \times 10^{-38}$  (Figure  
228 1b). However, the variance in *depression* score explained by the TSLE appears lower  
229 than the variance explained by the measure of PSLE used in Colodro-Conde *et al.*  
230 (12.9%). There was no significant difference in the direct effect of TSLE between  
231 women and men. Although questions about "dependent" SLE (DSLE, mean = 0.4 SLE)  
232 represented over 28% of the TSLE-items reported, the main effect of DSLE explained  
233 approximately 93% of the amount of variance explained by TSLE (*full cohort*: variance  
234 explained = 4.56%,  $\beta = 0.212$ , s.e. =  $0.014$ ,  $p = 1.73 \times 10^{-54}$ ; *men*: 3.74%,  $\beta = 0.193$ , s.e. =  
235  $0.021$ ,  $p = 9.66 \times 10^{-21}$ ; *women*: 5.07%,  $\beta = 0.225$ , s.e. =  $0.018$ ,  $p = 8.09 \times 10^{-35}$ ; see  
236 Figure 1b). "Independent" SLE (ISLE, mean = 0.85 SLE), which represented over 69% of  
237 TSLE-items, explained approximately 57% of the amount of variance explained by TSLE  
238 (*full cohort*: variance explained = 2.80%,  $\beta = 0.167$ , s.e. =  $0.014$ ,  $p = 1.32 \times 10^{-33}$ ; *men*:  
239 2.44%,  $\beta = 0.156$ , s.e. =  $0.022$ ,  $p = 2.88 \times 10^{-13}$ ; *women*: 3.02%,  $\beta = 0.174$ , s.e. =  $0.018$ ,  $p$   
240 =  $5.20 \times 10^{-22}$ ; see Figure 1b). When DSLE and ISLE were combined together in a single

241 model, DSLE explained 3.34% of the variance of depressive score compared to 1.45%  
242 of the variance being explained by ISLE. This suggests that DSLE have a greater effect  
243 on liability to depressive symptoms than ISLE.

244 We detected significant, albeit weak, GxE effects on *depression* score as  
245 conceptualized in the *diathesis-stress* model (see figure 2). The PRS interaction with  
246 TSLE was significant in the full cohort ( $\beta = 0.028$ , s.e. = 0.014,  $R^2 = 0.08\%$ ,  $p = 4.87 \times 10^{-2}$ )  
247 and slightly stronger in women ( $\beta = 0.044$ , s.e. = 0.018,  $R^2 = 0.19\%$ ,  $p = 1.66 \times 10^{-2}$ ;  
248 see figure 2a). The best-fit threshold was much lower in women ( $p$ -threshold =  $1 \times 10^{-5}$ )  
249 compared to the full cohort ( $p$ -threshold = 0.01). GxE effects estimated in women and  
250 men at  $p$ -threshold =  $1 \times 10^{-5}$  were significantly different (GxE\*sex  $p = 0.017$ ), but not  
251 at the best  $p$ -threshold in the full cohort ( $p$ -threshold = 0.01, GxE\*sex  $p = 0.32$ ). In  
252 women, GxE effect with DSLE predicted *depression* score ( $p$ -threshold =  $1 \times 10^{-5}$ ;  $\beta =$   
253 0.039, s.e. = 0.019,  $R^2 = 0.15\%$ ,  $p = 3.85 \times 10^{-2}$ ; see figure 2b), as did the GxE effect with  
254 ISLE ( $p$ -threshold =  $1 \times 10^{-5}$ ;  $\beta = 0.040$ , s.e. = 0.019,  $R^2 = 0.16\%$ ,  $p = 3.32 \times 10^{-2}$ ; see  
255 figure 2c). No significant interaction was detected in men (best-fit  $p$ -threshold = 0.1)  
256 using either TSLE ( $\beta = 0.039$ , s.e. = 0.022,  $R^2 = 0.15\%$ ,  $p = 7.19 \times 10^{-2}$ ; see figure 2a),  
257 DSLE ( $\beta = 0.024$ , s.e. = 0.022,  $R^2 = 0.06\%$ ,  $p = 0.28$ ; see figure 2b) or ISLE ( $\beta = 0.043$ , s.e.  
258 = 0.022,  $R^2 = 0.18\%$ ,  $p = 5.47 \times 10^{-2}$ ; see figure 2c).

259 Examination of the significant GxE detected by SLE categories (i.e. “missing”, “low” and  
260 “high”) suggests that in participants reporting TSLE the risk of depressive symptoms  
261 was higher when greater numbers of SLE were reported; whereas in participants who  
262 reported no SLE over the preceding 6 months, the risk of depressive symptoms was  
263 the same regardless of their *diathesis* risk (“missing”: PRS’  $\beta = 0.021$ , s.e. = 0.022,  $p =$   
264 0.339; “low”: PRS’  $\beta = 0.043$ , s.e. = 0.021,  $p = 0.039$ ; “high”: PRS’  $\beta = 0.142$ , s.e. = 0.039,

265  $p = 2.86 \times 10^{-4}$ ; see Table 1 and figure 3a). Although a similar pattern by increasing SLE  
 266 was observed in women (see Table 1, figure 3b and Supplementary figure 2), we only  
 267 detected a significant *diathesis* effect on *depression* score in those women who did not  
 268 experienced TSLE over the last 6 months. This effect was negative (PRS'  $\beta = -0.061$ , s.e.  
 269  $= 0.029$ ,  $p = 0.037$ ,  $R^2 = 0.3\%$ ; see figure 3b), suggesting a protective effect of  
 270 increasing PRS' in those women reporting no SLE, and suggesting that the contributing  
 271 alleles may make an individual sensitive to both positive and negative environmental  
 272 effects (i.e. “plasticity alleles” rather than “risk alleles”)<sup>51,52</sup>.

## 273 DISCUSSION

274 The findings reported in this study replicate those of Colodro-Conde *et al.* results in an  
275 independent sample from Generation Scotland of similar sample size and study design,  
276 and suggest possible sex-specific differences in genetic risk of MDD in response to  
277 “dependent” SLE.

278 We identified significant, albeit weak, GxE effect in liability to depression at the  
279 population level ( $p = 4.87 \times 10^{-2}$ ) and in women ( $p = 1.66 \times 10^{-2}$ ), but not in men ( $p =$   
280  $7.19 \times 10^{-2}$ ). Both Colodro-Conde *et al.* and our studies suggest that individuals with an  
281 inherent genetic predisposition to MDD, reporting high number of recent SLE, are at  
282 additional risk of depressive symptoms due to GxE effects, supporting the *diathesis-*  
283 *stress* theory. However, these interactions did not survive multiple testing correction  
284 and the power of these studies to draw robust conclusions remains limited<sup>53</sup>. With  
285 increased power these studies could more accurately determine both the presence  
286 and magnitude of a gene-by-environment interaction in depression.

287 In the full cohort, the total variance of depressive score explained by the PRS’ main  
288 effect and the GxE effect jointly was 0.34%, of which 0.07% was attributed to the GxE  
289 effect ( $p$ -threshold = 0.01; PRS  $p = 1.19 \times 10^{-4}$ , GxE  $p = 4.87 \times 10^{-2}$ ; both derived from  
290 the full diathesis-model with TSLE); lower than the proportion of variance attributed to  
291 common SNPs (8.9%) in the full PGC-MDD analysis<sup>20</sup>. As Colodro-Conde *et al.* noted,  
292 this result aligns with estimates from experimental organisms suggesting that around  
293 20% of the heritability may be typically attributed to the effects of GxE<sup>54</sup>, although it is  
294 inconsistent with the majority of human traits with the potential exception of  
295 depression<sup>55</sup>.

296 We saw concordance between our results and those of Colodro-Conde *et al.*<sup>27</sup>  
 297 Consistent with PRS predicting PSLE in Colodro-Conde *et al.*, PRS for MDD predicted  
 298 SLE in our study (see Supplementary Figure 1), although not at the  $p$ -threshold at  
 299 which significant GxE effects were detected. *Depression* score was positive correlated  
 300 with self-reported SLE scores (TSLE:  $r^2 = 0.214$ , DSLE:  $r^2 = 0.211$ , ISLE:  $r^2 = 0.169$ ; all  $p <$   
 301  $2.2 \times 10^{-16}$ ). Genetic and phenotypic correlations, added to the usage of self-reported  
 302 screening to construct the measures fitted into the analysis, suggest possible  
 303 confounding i.e. self-report bias. Genetic correlation between SLE and MDD may be  
 304 driven by genetic factors which results in greater exposure to highly stressful/risky  
 305 environments, or via personality traits, such as neuroticism, which shows positive  
 306 associations with negative response to and greater reporting of negative life  
 307 events<sup>56,57</sup>. This genetic correlation implies that the SLE effect is unlikely to act solely  
 308 as an environmental risk factor, and genetic factors predisposing to MDD may also  
 309 increase exposure to/reporting of SLE. This hinders to interpret our findings as pure  
 310 GxE effects. To solve this limitation and assess this aspect, Colodro-Conde *et al.* broke  
 311 down the PSLE measure into SLE in which the individual may played an active role  
 312 (PSLE-active) or a passive role (PSLE-passive)<sup>47,58</sup>. Equivalently, we split the TSLE  
 313 measure of 12-items into SLE that are potentially either SLE “dependent” (DSLE; 6-  
 314 items) on a participant’s own behaviour (i.e. therefore potentially driven by genetic  
 315 factors) or not (“independent” SLE, ISLE; 5-items)<sup>44,47</sup>. PSLE-active and DSLE are  
 316 reported to be more heritable and have stronger associations with MDD than PSLE-  
 317 passive or ISLE<sup>47,58,59</sup>. Thus, if the GxE detected were driven by ISLE it would point  
 318 towards a more pure GxE rather than a subtle genotype-by-genotype (GxG) interaction  
 319 or genotype-by-genotype-by-environment (GxGxE) interaction. We observed in our

study that although DSLE was significantly heritable ( $h^2_{\text{SNP}} = 0.131$ , s.e. = 0.071,  $p = 0.029$ ) and reporting ISLE was not significantly heritable ( $h^2_{\text{SNP}} = 0.000$ , s.e. = 0.072,  $p = 0.5$ ), in women significant GxE was seen for both. In Colodro-Conde *et al.*, PSLE-active explained most of the variance explained by PSLE. PSLE-passive score explained a marginal amount of variance (0.77%) compared to the PSLE measure (10.5%). In addition, conversely to our findings in which we identified significant GxE effects within women using all three measures of SLE, and explaining similar amount of variances (0.15% – 0.19%; see figure 2), Colodro-Conde *et al.* did not identify significant GxE using PSLE-passive.

Despite the replicated findings supporting the *diathesis-stress* model, there are a few differences between our study and Colodro-Conde *et al.* to consider. First, differences in PRS profiling may have affected replication power. We used the same equivalent PGC-MDD2 GWAS as discovery sample. However, whereas Colodro-Conde *et al.* generated PRS in their target sample containing over 9.5M imputed SNP, in this study we generated PRS in a target sample of over 560K genotyped SNPs (see Supplementary table 1 for comparison). This potentially results in a less informative PRS in our study, with less predictive power, although the variance explained by our PRS' was slightly larger (0.64% vs. 0.46%). The size of the discovery sample is key to constructing an accurate predictive PRS, but to exploit the most of the variants available may be an asset<sup>53</sup>.

Secondly, different screening tools were used to measure both current depression and recent environmental stressors across the two studies. Both studies transformed their data, using item response theory or by log-transformation, to improve the data distribution. However, neither study used depression scores that were normally



distributed; and although both screening methods have been validated and applied to detect depressive symptoms, different questions may cover and emphasise different features of the illness and may result in different results<sup>54,60</sup>. The same applies to the measurement of environmental stressors. We used a measure of 12-items adapted from the List of Threatening Experiences (LTE) to assess SLE over the past 6 months. However, Colodro-Conde *et al.* used a self-reported PSLE measure over the last 12 months, thus covering a longer time-period of exposure to SLE prior to the assessment of current depressive symptoms than in our study. PSLE included the same 12-item LTE we assessed. However, they added seven items concerning serious problems getting along with others (i.e. spouse, someone living with you, a close friend, etc), a range of incidents highly subject to an individual's own behaviour. Thus, PSLE contains a greater number of DSLE/PSLE-active-like items than ISLE/PSLE-passive-like items compared to the original 12-item LTE (and TSLE). Although the overall number of DSLE-items reported in our study represented less than 30% of the overall number of TSLE-items reported, DSLE explained over 90% of the equivalent variance explained by TSLE (see figure 2b). However, ISLE explained (~57%) far more than the remaining variance. Both DSLE and ISLE effects jointly assessed in a single model showed that DSLE explained 70% of the variance of depressive score explained by TSLE, compared to only 30% of such variance being explained by ISLE. Therefore, both covering longer time-period and upweighting by DSLE/PSLE-active-like items may explain the increased explanatory power of PSLE (12.9%) used by Colodro-Conde *et al.* to predict *depression* score compared to our TSLE measure (4.91%).

Finally, the LTE used to construct stress measures in both studies, despite being a validated and robust screening tool, does not cover a wide range of life events with

marked long-term, or mild to moderate contextual stress, that could impact on the final adversity faced by an individual. These unmeasured aspects of the environmental exposure or its impact may also contribute to lack of stronger replication and positive findings. However, these sources of bias (e.g. self-reporting bias) may be solved soon by extracting data directly from national population-based electronic records (i.e. medical, criminal, financial, historical, etc). Not only time-point measures but also longitudinal scores may be constructed over lifespan to study GxE under a life-course approach. Some studies suggests that the presence of environment-by-environment (ExE) and gene-by-environment-by-environment (GxExE) interactions over lifespan are responsible of the development of mental disorders<sup>61,62</sup>. Therefore, a life-course approach using linkable datasets is likely to help to better detect GxE effects, while reducing bias, and thus provide a better understanding of both genetics and environmental factors involved into the genetic-environment interplay underlying depression, and mental illness in general.

In women ( $p$ -threshold =  $1 \times 10^{-5}$ ,  $p = 1.66 \times 10^{-2}$ ), the GxE effect estimates were significantly higher ( $p = 0.017$ ) than that in men, suggesting possible differences in the aetiology of depression between sexes. However, such difference was not significant ( $p = 0.32$ ) at  $p$ -threshold (0.01) where significant GxE effect was detected in the full cohort. This may explain previous differences seen between sexes such as in: associated risk (i.e. approximately 1.5 - 2-fold higher in women), symptoms reported and/or coping strategies (e.g. whereas women tend to cope through verbal and emotional strategies, men tend to cope by doing sport and consuming alcohol)<sup>63-67</sup>. This also aligns with an increased risk associated with a lack of social support seen in women compared to men<sup>27</sup>. Furthermore, although we do not know whether

392 participants experienced recent events with positive effects, some genetic variants  
 393 associated with MDD may operate as ‘plasticity alleles’ and not just as ‘risk alleles’,  
 394 which could provide a protective effect in those women who did not experienced  
 395 recent SLE (and who may or may not have experienced positive environments;  $p =$   
 396  $0.037$ )<sup>51,52</sup>. This would be consistent with a differential-susceptibility model<sup>68,69</sup> of  
 397 depression. This has been suggested for the interaction effects seen between the  
 398 serotonin transporter linked promoter region gene (5-HTTLPR) locus and family  
 399 support and liability to adolescent depression in boys<sup>70</sup>. However, our result is only  
 400 nominally significant and will require replication in larger samples. Conversely, in the  
 401 full cohort, our findings were consistent with a latent *diathesis* being activated by the  
 402 presence of stress to manifest symptoms of depression as proposed by the *diathesis-*  
 403 *stress* model. Future GxE studies of depression should assess the full range of life  
 404 events (i.e. positive and negative).

405 Empirically demonstrating the *diathesis-stress* theory for depression would validate  
 406 recent<sup>24-26,28</sup> and future studies using a genome-wide approach to identify genetic  
 407 mechanisms and interactive pathways involved in GxE underpinning the causative  
 408 effect of “stress” in the development of depressive symptoms and mental illness in  
 409 general. Furthermore, sex-specific differences may improve personalized treatments  
 410 and therapies such as better coping strategies. This study adds to our understanding of  
 411 gene-by-environment interactions, although larger samples will be required to confirm  
 412 the suggested differences in *diathesis-stress* effects between men and women.

## 413     **ACKNOWLEDGMENTS**

414     The 1<sup>st</sup> author AAS is funded by University of Edinburgh ([www.ed.ac.uk](http://www.ed.ac.uk)) and MRC for  
415     his PhD study at the University of Edinburgh Institute of Genetics and Molecular  
416     Medicine ([www.ed.ac.uk/igmm](http://www.ed.ac.uk/igmm)). DJM acknowledges the financial support of NHS  
417     Research Scotland (NRS), through NHS Lothian. MA is supported by STRADL through a  
418     Wellcome Trust Strategic Award (reference 104036/Z/14/Z). Generation Scotland  
419     received core support from the Chief Scientist Office of the Scottish Government  
420     Health Directorates [CZD/16/6] and the Scottish Funding Council [HR03006].  
421     Genotyping of the GS:SFHS samples was carried out by the Genetics Core Laboratory at  
422     the Wellcome Trust Clinical Research Facility, Edinburgh, Scotland and was funded by  
423     the Medical Research Council UK and the Wellcome Trust (Wellcome Trust Strategic  
424     Award “STratifying Resilience and Depression Longitudinally” (STRADL) Reference  
425     104036/Z/14/Z). The Psychiatric Genomics Consortium MDD Working Group depends  
426     on the contributions of many parties.

427

## 428     **FINANCIAL DISCLOSURE**

429     The authors declare no conflict of interest.

## 430 REFERENCES

- 431 1. Hammen, C. Stress and depression. *Annu Rev Clin Psychol* **1**, 293-319  
432 (2005).
- 433 2. Kessler, R.C. The effects of stressful life events on depression. *Annu Rev*  
434 *Psychol* **48**, 191-214 (1997).
- 435 3. Kendler, K.S., Karkowski, L.M. & Prescott, C.A. Causal relationship between  
436 stressful life events and the onset of major depression. *Am J Psychiatry* **156**,  
437 837-41 (1999).
- 438 4. Paykel, E.S. Life events and affective disorders. *Acta Psychiatr Scand Suppl*,  
439 61-6 (2003).
- 440 5. Stroud, C.B., Davila, J. & Moyer, A. The relationship between stress and  
441 depression in first onsets versus recurrences: a meta-analytic review. *J*  
442 *Abnorm Psychol* **117**, 206-13 (2008).
- 443 6. Ensel, W.M., Peek, M.K., Lin, N. & Lai, G. Stress in the life course: a life history  
444 approach. *J Aging Health* **8**, 389-416 (1996).
- 445 7. Kendler, K.S., Karkowski, L.M. & Prescott, C.A. Stressful life events and major  
446 depression: risk period, long-term contextual threat, and diagnostic  
447 specificity. *J Nerv Ment Dis* **186**, 661-9 (1998).
- 448 8. Mazure, C.M. Life Stressors as Risk Factors in Depression. *Clinical*  
449 *Psychology: Science and Practice* **5**, 291-313 (1998).
- 450 9. Lichtenberg, P. & Belmaker, R.H. Subtyping major depressive disorder.  
451 *Psychother Psychosom* **79**, 131-5 (2010).
- 452 10. Elisei, S., Sciarma, T., Verdolini, N. & Anastasi, S. Resilience and depressive  
453 disorders. *Psychiatr Danub* **25 Suppl 2**, S263-7 (2013).
- 454 11. Bleuler, M. Conception of Schizophrenia Within the Last Fifty Years and  
455 Today [Abridged]. *Proc R Soc Med* **56**, 945-52 (1963).
- 456 12. Bebbington, P. Misery and beyond: the pursuit of disease theories of  
457 depression. *Int J Soc Psychiatry* **33**, 13-20 (1987).
- 458 13. McGuffin, P., Katz, R. & Bebbington, P. The Camberwell Collaborative  
459 Depression Study. III. Depression and adversity in the relatives of  
460 depressed probands. *Br J Psychiatry* **152**, 775-82 (1988).
- 461 14. Robins, C.J. & Block, P. Cognitive theories of depression viewed from a  
462 diathesis-stress perspective: Evaluations of the models of Beck and of  
463 Abramson, Seligman, and Teasdale. *Cognitive Therapy and Research* **13**,  
464 297-313 (1989).
- 465 15. Monroe, S.M. & Simons, A.D. Diathesis-stress theories in the context of life  
466 stress research: implications for the depressive disorders. *Psychol Bull* **110**,  
467 406-25 (1991).
- 468 16. Vogel, F. Schizophrenia genesis: The origins of madness. *American Journal of*  
469 *Human Genetics* **48**, 1218-1218 (1991).
- 470 17. Mann, J.J., Waternaux, C., Haas, G.L. & Malone, K.M. Toward a clinical model  
471 of suicidal behavior in psychiatric patients. *Am J Psychiatry* **156**, 181-9  
472 (1999).
- 473 18. Riemann, D. *et al.* The hyperarousal model of insomnia: a review of the  
474 concept and its evidence. *Sleep Med Rev* **14**, 19-31 (2010).
- 475 19. Bolt, M.A., Helming, L.M. & Tintle, N.L. The Associations between Self-  
476 Reported Exposure to the Chernobyl Nuclear Disaster Zone and Mental  
477 Health Disorders in Ukraine. *Front Psychiatry* **9**, 32 (2018).

- 478 20. Wray, N.R. & Sullivan, P.F. Genome-wide association analyses identify 44  
479 risk variants and refine the genetic architecture of major depression.  
480 *bioRxiv* (2017).
- 481 21. Peyrot, W.J. *et al.* Effect of polygenic risk scores on depression in childhood  
482 trauma. *Br J Psychiatry* **205**, 113-9 (2014).
- 483 22. Musliner, K.L. *et al.* Polygenic risk, stressful life events and depressive  
484 symptoms in older adults: a polygenic score analysis. *Psychol Med* **45**, 1709-  
485 20 (2015).
- 486 23. Peyrot, W.J. *et al.* Does Childhood Trauma Moderate Polygenic Risk for  
487 Depression? A Meta-analysis of 5765 Subjects From the Psychiatric  
488 Genomics Consortium. *Biol Psychiatry* (2017).
- 489 24. Dunn, E.C. *et al.* Genome-Wide Association Study (Gwas) and Genome-Wide  
490 by Environment Interaction Study (Gweis) of Depressive Symptoms in  
491 African American and Hispanic/Latina Women. *Depress Anxiety* **33**, 265-80  
492 (2016).
- 493 25. Otowa, T. *et al.* The First Pilot Genome-Wide Gene-Environment Study of  
494 Depression in the Japanese Population. *PLoS One* **11**, e0160823 (2016).
- 495 26. Ikeda, M. *et al.* Genome-wide environment interaction between depressive  
496 state and stressful life events. *J Clin Psychiatry* **77**, e29-30 (2016).
- 497 27. Colodro-Conde, L. *et al.* A direct test of the diathesis-stress model for  
498 depression. *Mol Psychiatry* (2017).
- 499 28. Coleman, J.R.I., Eley, T.C. & Breen, G. Genome-wide gene-environment  
500 analyses of depression and reported lifetime traumatic experiences in UK  
501 Biobank. *bioRxiv* (2018).
- 502 29. Mullins, N. *et al.* Polygenic interactions with environmental adversity in the  
503 aetiology of major depressive disorder. *Psychol Med* **46**, 759-70 (2016).
- 504 30. Iyegbe, C., Campbell, D., Butler, A., Ajnakina, O. & Sham, P. The emerging  
505 molecular architecture of schizophrenia, polygenic risk scores and the  
506 clinical implications for GxE research. *Soc Psychiatry Psychiatr Epidemiol* **49**,  
507 169-82 (2014).
- 508 31. McGrath, J.J., Mortensen, P.B., Visscher, P.M. & Wray, N.R. Where GWAS and  
509 epidemiology meet: opportunities for the simultaneous study of genetic and  
510 environmental risk factors in schizophrenia. *Schizophr Bull* **39**, 955-9  
511 (2013).
- 512 32. Plomin, R. Commentary: missing heritability, polygenic scores, and gene-  
513 environment correlation. *J Child Psychol Psychiatry* **54**, 1147-9 (2013).
- 514 33. Wray, N.R. *et al.* Research review: Polygenic methods and their application  
515 to psychiatric traits. *J Child Psychol Psychiatry* **55**, 1068-87 (2014).
- 516 34. Navrady, L.B. *et al.* Cohort Profile: Stratifying Resilience and Depression  
517 Longitudinally (STRADL): a questionnaire follow-up of Generation Scotland:  
518 Scottish Family Health Study (GS:SFHS). *Int J Epidemiol* (2017).
- 519 35. Smith, B.H. *et al.* Generation Scotland: the Scottish Family Health Study; a  
520 new resource for researching genes and heritability. *BMC Med Genet* **7**, 74  
521 (2006).
- 522 36. Fernandez-Pujals, A.M. *et al.* Epidemiology and Heritability of Major  
523 Depressive Disorder, Stratified by Age of Onset, Sex, and Illness Course in  
524 Generation Scotland: Scottish Family Health Study (GS:SFHS). *PLoS One* **10**,  
525 e0142197 (2015).

- 526 37. Smith, B.H. *et al.* Cohort Profile: Generation Scotland: Scottish Family Health  
527 Study (GS:SFHS). The study, its participants and their potential for genetic  
528 research on health and illness. *Int J Epidemiol* **42**, 689-700 (2013).
- 529 38. Amador, C. *et al.* Recent genomic heritage in Scotland. *BMC Genomics* **16**,  
530 437 (2015).
- 531 39. Kerr, S.M. *et al.* Pedigree and genotyping quality analyses of over 10,000  
532 DNA samples from the Generation Scotland: Scottish Family Health Study.  
533 *BMC Med Genet* **14**, 38 (2013).
- 534 40. Purcell, S. *et al.* PLINK: a tool set for whole-genome association and  
535 population-based linkage analyses. *Am J Hum Genet* **81**, 559-75 (2007).
- 536 41. Goldberg, D.P. & Hillier, V.F. A scaled version of the General Health  
537 Questionnaire. *Psychol Med* **9**, 139-45 (1979).
- 538 42. Sterling, M. General Health Questionnaire - 28 (GHQ-28). *J Physiother* **57**,  
539 259 (2011).
- 540 43. Goldberg, D.P. *et al.* The validity of two versions of the GHQ in the WHO  
541 study of mental illness in general health care. *Psychol Med* **27**, 191-7 (1997).
- 542 44. Brugha, T., Bebbington, P., Tennant, C. & Hurry, J. The List of Threatening  
543 Experiences: a subset of 12 life event categories with considerable long-  
544 term contextual threat. *Psychol Med* **15**, 189-94 (1985).
- 545 45. Brugha, T.S. & Cragg, D. The List of Threatening Experiences: the reliability  
546 and validity of a brief life events questionnaire. *Acta Psychiatr Scand* **82**, 77-  
547 81 (1990).
- 548 46. Motrico, E. *et al.* Psychometric properties of the List of Threatening  
549 Experiences--LTE and its association with psychosocial factors and mental  
550 disorders according to different scoring methods. *J Affect Disord* **150**, 931-  
551 40 (2013).
- 552 47. Kendler, K.S., Karkowski, L.M. & Prescott, C.A. The assessment of  
553 dependence in the study of stressful life events: validation using a twin  
554 design. *Psychol Med* **29**, 1455-60 (1999).
- 555 48. Euesden, J., Lewis, C.M. & O'Reilly, P.F. PRSice: Polygenic Risk Score  
556 software. *Bioinformatics* **31**, 1466-8 (2015).
- 557 49. Yang, J., Lee, S.H., Goddard, M.E. & Visscher, P.M. GCTA: a tool for genome-  
558 wide complex trait analysis. *Am J Hum Genet* **88**, 76-82 (2011).
- 559 50. Keller, M.C. Gene x environment interaction studies have not properly  
560 controlled for potential confounders: the problem and the (simple) solution.  
561 *Biol Psychiatry* **75**, 18-24 (2014).
- 562 51. Belsky, J. & Beaver, K.M. Cumulative-genetic plasticity, parenting and  
563 adolescent self-regulation. *J Child Psychol Psychiatry* **52**, 619-26 (2011).
- 564 52. Belsky, J. *et al.* Vulnerability genes or plasticity genes? *Mol Psychiatry* **14**,  
565 746-54 (2009).
- 566 53. Dudbridge, F. Power and predictive accuracy of polygenic risk scores. *PLoS*  
567 *Genet* **9**, e1003348 (2013).
- 568 54. Eaves, L.J., Last, K., Martin, N.G. & Jinks, J.L. A progressive approach to non-  
569 additivity and genotype-environmental covariance in the analysis of human  
570 differences. *British Journal of Mathematical and Statistical Psychology* **30**, 1-  
571 42 (1977).
- 572 55. Polderman, T.J. *et al.* Meta-analysis of the heritability of human traits based  
573 on fifty years of twin studies. *Nat Genet* **47**, 702-9 (2015).

- 574 56. Kendler, K.S., Kuhn, J. & Prescott, C.A. The interrelationship of neuroticism,  
575 sex, and stressful life events in the prediction of episodes of major  
576 depression. *Am J Psychiatry* **161**, 631-6 (2004).
- 577 57. Magnus, K., Diener, E., Fujita, F. & Pavot, W. Extraversion and neuroticism as  
578 predictors of objective life events: a longitudinal analysis. *J Pers Soc Psychol*  
579 **65**, 1046-53 (1993).
- 580 58. Plomin, R., Lichtenstein, P., Pedersen, N.L., McClearn, G.E. & Nesselroade, J.R.  
581 Genetic influence on life events during the last half of the life span. *Psychol*  
582 *Aging* **5**, 25-30 (1990).
- 583 59. Clarke, T.K. *et al.* Genetic and environmental determinants of stressful life  
584 events and their overlap with depression and neuroticism [version 1;  
585 referees: awaiting peer review]. in *Wellcome Open Research* Vol. 3 %M  
586 10.12688/wellcomeopenres.13893.1 (2018).
- 587 60. Kang, S.-M. & G. Waller, N. *Moderated Multiple Regression, Spurious*  
588 *Interaction Effects, and IRT*, 87-105 (2005).
- 589 61. Keers, R. & Pluess, M. Childhood quality influences genetic sensitivity to  
590 environmental influences across adulthood: A life-course Gene x  
591 Environment interaction study. *Dev Psychopathol* **29**, 1921-1933 (2017).
- 592 62. Assary, E., Vincent, J.P., Keers, R. & Pluess, M. Gene-environment interaction  
593 and psychiatric disorders: Review and future directions. *Semin Cell Dev Biol*  
594 (2017).
- 595 63. Weissman, M.M. *et al.* Sex differences in rates of depression: cross-national  
596 perspectives. *J Affect Disord* **29**, 77-84 (1993).
- 597 64. Van de Velde, S., Bracke, P. & Levecque, K. Gender differences in depression  
598 in 23 European countries. Cross-national variation in the gender gap in  
599 depression. *Soc Sci Med* **71**, 305-13 (2010).
- 600 65. Labonte, B. *et al.* Sex-specific transcriptional signatures in human  
601 depression. *Nat Med* (2017).
- 602 66. Angst, J. *et al.* Gender differences in depression. Epidemiological findings  
603 from the European DEPRES I and II studies. *Eur Arch Psychiatry Clin*  
604 *Neurosci* **252**, 201-9 (2002).
- 605 67. Piccinelli, M. & Wilkinson, G. Gender differences in depression. Critical  
606 review. *Br J Psychiatry* **177**, 486-92 (2000).
- 607 68. Belsky, J. & Pluess, M. Beyond diathesis stress: differential susceptibility to  
608 environmental influences. *Psychol Bull* **135**, 885-908 (2009).
- 609 69. Belsky, J., Bakermans-Kranenburg, M.J. & van Ijzendoorn, M.H. For Better  
610 and for Worse: Differential Susceptibility to Environmental Influences.  
611 *Current Directions in Psychological Science* **16**, 300-304 (2007).
- 612 70. Li, J.J., Berk, M.S. & Lee, S.S. Differential susceptibility in longitudinal models  
613 of gene-environment interaction for adolescent depression. *Dev*  
614 *Psychopathol* **25**, 991-1003 (2013).

615

616



## 617 **FIGURE LEGENDS**

618 **Figure 1. a)** Association between polygenic risk scores (PRS) and depressive score  
 619 (main effects, one-sided tests). PRS were generated at 8 *p*-threshold levels using  
 620 summary statistics from the Psychiatric Genetic Consortium MDD GWAS (released July  
 621 2016) with the exclusion of Generation Scotland participants. Depression score was  
 622 derived from The General Health Questionnaire. Y-axis represents the % of variance of  
 623 depression score explained by PRS main effects. Full cohort (yellow) was split into men  
 624 (blue) and women (red). **b)** Association between number of SLE reported and  
 625 depression score (main effect, one-sided tests, results expressed in % of depression  
 626 score explained). SLE were self-reported through a brief life events questionnaire  
 627 based on the List of Threatening Experiences and categorized into: total number of SLE  
 628 reported (TSLE), “dependent” SLE (DSLE) or “independent” SLE (ISLE). Full cohort  
 629 (yellow) was split into men (blue) and women (red).

630 **Figure 2.** Association between GxE effect and depression score. Results represent  
 631 percentage of depression score explained by the interaction term (two-sided tests)  
 632 fitted in linear mixed models to empirically test the *diathesis-stress* model. Red  
 633 numbers show significant interactions *p*-values. Full cohort (yellow) was split into men  
 634 (blue) and women (red). PRS were generated at 8 *p*-threshold levels using summary  
 635 statistics from the Psychiatric Genetic Consortium MDD GWAS (released July 2016)  
 636 with the exclusion of Generation Scotland participants. The interaction effect was  
 637 tested with **a)** the number of SLE reported (TSLE), **b)** “dependent” SLE (DSLE) and **c)**  
 638 “independent” SLE (ISLE).

639 **Figure 3.** Scatterplot of significant *diathesis-stress* interactions on the risk of depressive  
 640 symptoms **a)** in full cohort and **b)** in women. X-axis represents the direct effect of PRS

641 (standard deviation from the mean) based on **a)**  $p$ -threshold = 0.01 and **b)**  $p$ -threshold  
642 =  $1 \times 10^{-5}$ , using the total number of SLE reported (TSLE) by each participant (dot) as  
643 environmental exposures at three SLE levels represented by colours. Blue: 0 SLE,  
644 “missing stress”,  $n = 1\,833/1\,041$ ; green: 1 or 2 SLE, “low stress”,  $n = 2\,311/1\,459$ ; red:  
645 3 or more SLE, “high stress”,  $n = 775/490$  in the full cohort and women, respectively. Y-  
646 axis reflects log transformed depression score standardized to mean of 0 and standard  
647 deviation of 1. Lines represent the increment of risk of depression under a certain  
648 degree of “stress” dependent on a genetic predisposition (= *diathesis*).  
649

**Table 1. *Diathesis* effect under 3 SLE categories at those significant GxE effect detected in the full cohort and in women.**

| Sample             | FULL COHORT                            |       |                         | WOMEN                                              |        |        |         |        |        |         |        |        |
|--------------------|----------------------------------------|-------|-------------------------|----------------------------------------------------|--------|--------|---------|--------|--------|---------|--------|--------|
| <i>diathesis</i>   | PRS at <i>p</i> value threshold = 0.01 |       |                         | PRS at <i>p</i> value threshold = 10 <sup>-5</sup> |        |        |         |        |        |         |        |        |
| SLE                | TSLE                                   |       |                         | TSLE                                               |        |        | DSLE    |        |        | ISLE    |        |        |
| SLE category       | missing                                | low   | high                    | missing                                            | low    | high   | missing | low    | high   | missing | low    | high   |
| N                  | 1833                                   | 2311  | 755                     | 1041                                               | 1459   | 490    | 2111    | 816    | 63     | 1393    | 1338   | 259    |
| Effect ( $\beta$ ) | 0.021                                  | 0.043 | 0.142                   | -0.061                                             | 0.014  | 0.078  | -0.022  | 0.061  | -0.05  | -0.044  | 0.027  | 0.079  |
| s.e.               | 0.022                                  | 0.021 | 0.039                   | 0.029                                              | 0.027  | 0.049  | 0.021   | 0.038  | 0.147  | 0.026   | 0.027  | 0.068  |
| t                  | 0.957                                  | 2.07  | 3.644                   | -2.086                                             | 0.541  | 1.609  | -1.055  | 1.605  | -0.337 | -1.654  | 0.978  | 1.16   |
| <i>p</i> value     | 0.339                                  | 0.039 | 2.86 x 10 <sup>-4</sup> | 0.037                                              | 0.589  | 0.108  | 0.292   | 0.109  | 0.738  | 0.098   | 0.328  | 0.247  |
| CI (95%)           | -0.022                                 | 0.002 | 0.065                   | -0.119                                             | -0.038 | -0.017 | -0.063  | -0.014 | -0.344 | -0.095  | -0.027 | -0.055 |
|                    | 0.065                                  | 0.084 | 0.218                   | -0.004                                             | 0.066  | 0.174  | 0.019   | 0.136  | 0.245  | 0.008   | 0.080  | 0.214  |

SLE categories (amount of SLE experienced): 0 SLE = "missing", 1 or 2 SLE = "low", and 3 or more SLE = "high". *TSLE*, *DSLE* and *ISLE* stand for "total", "dependent" and "independent" SLE reported.

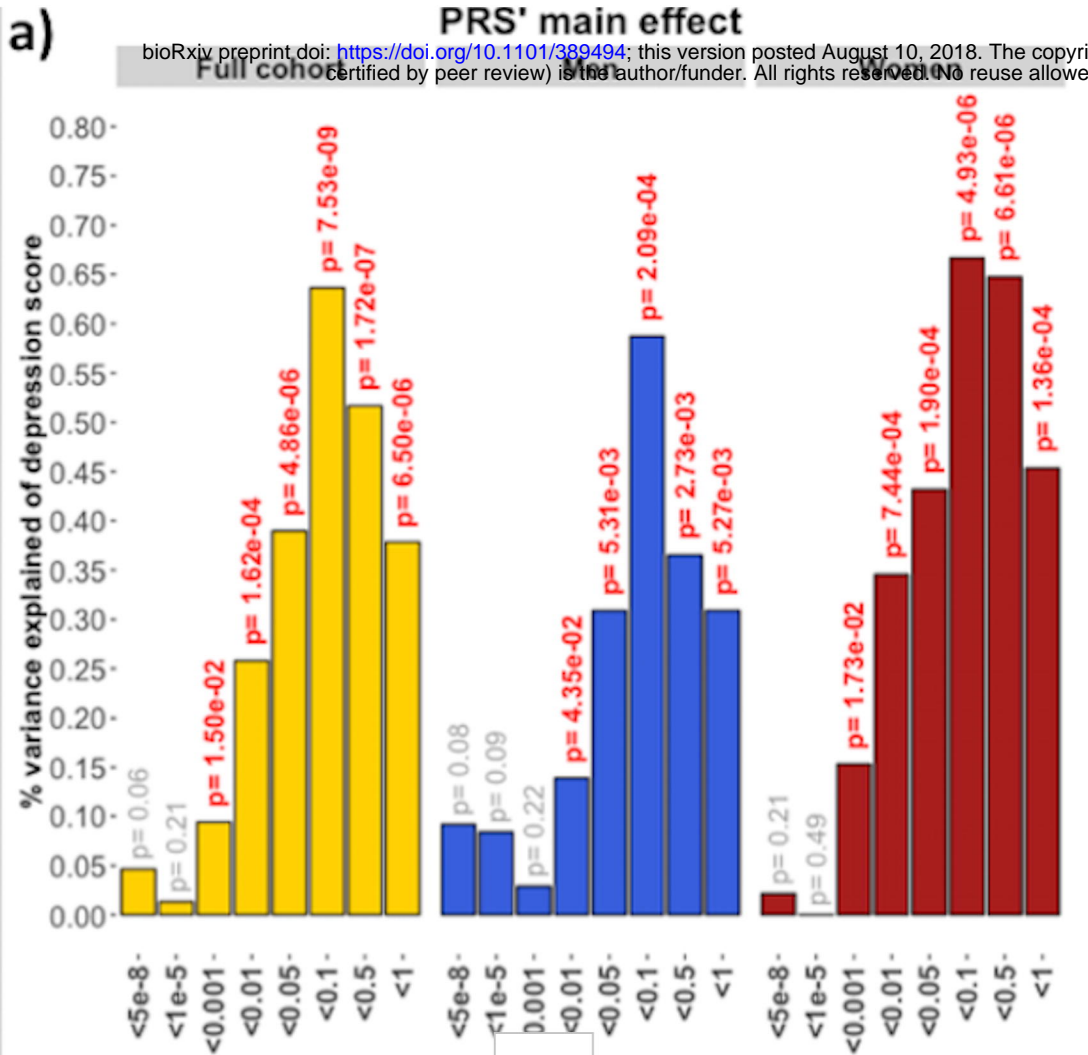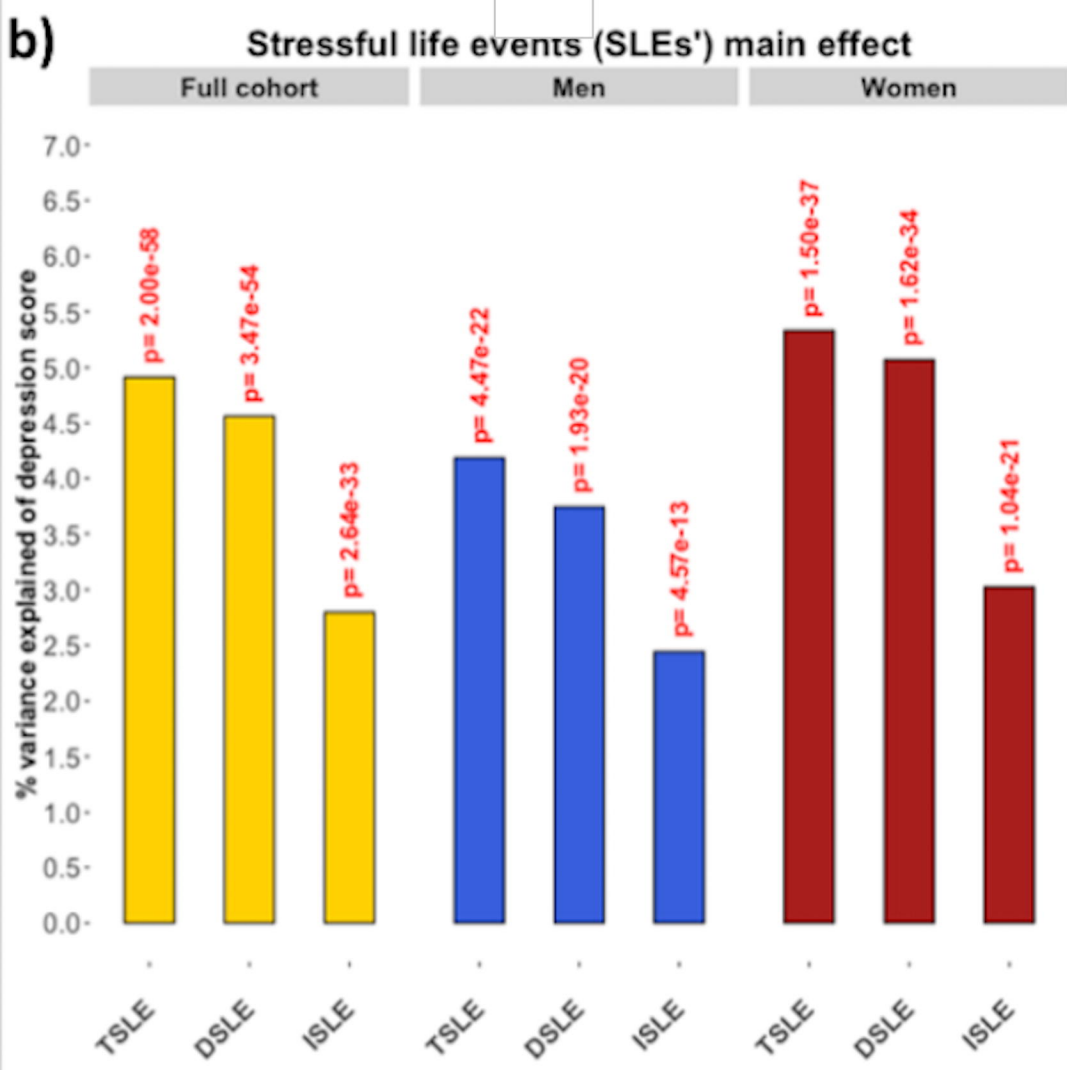

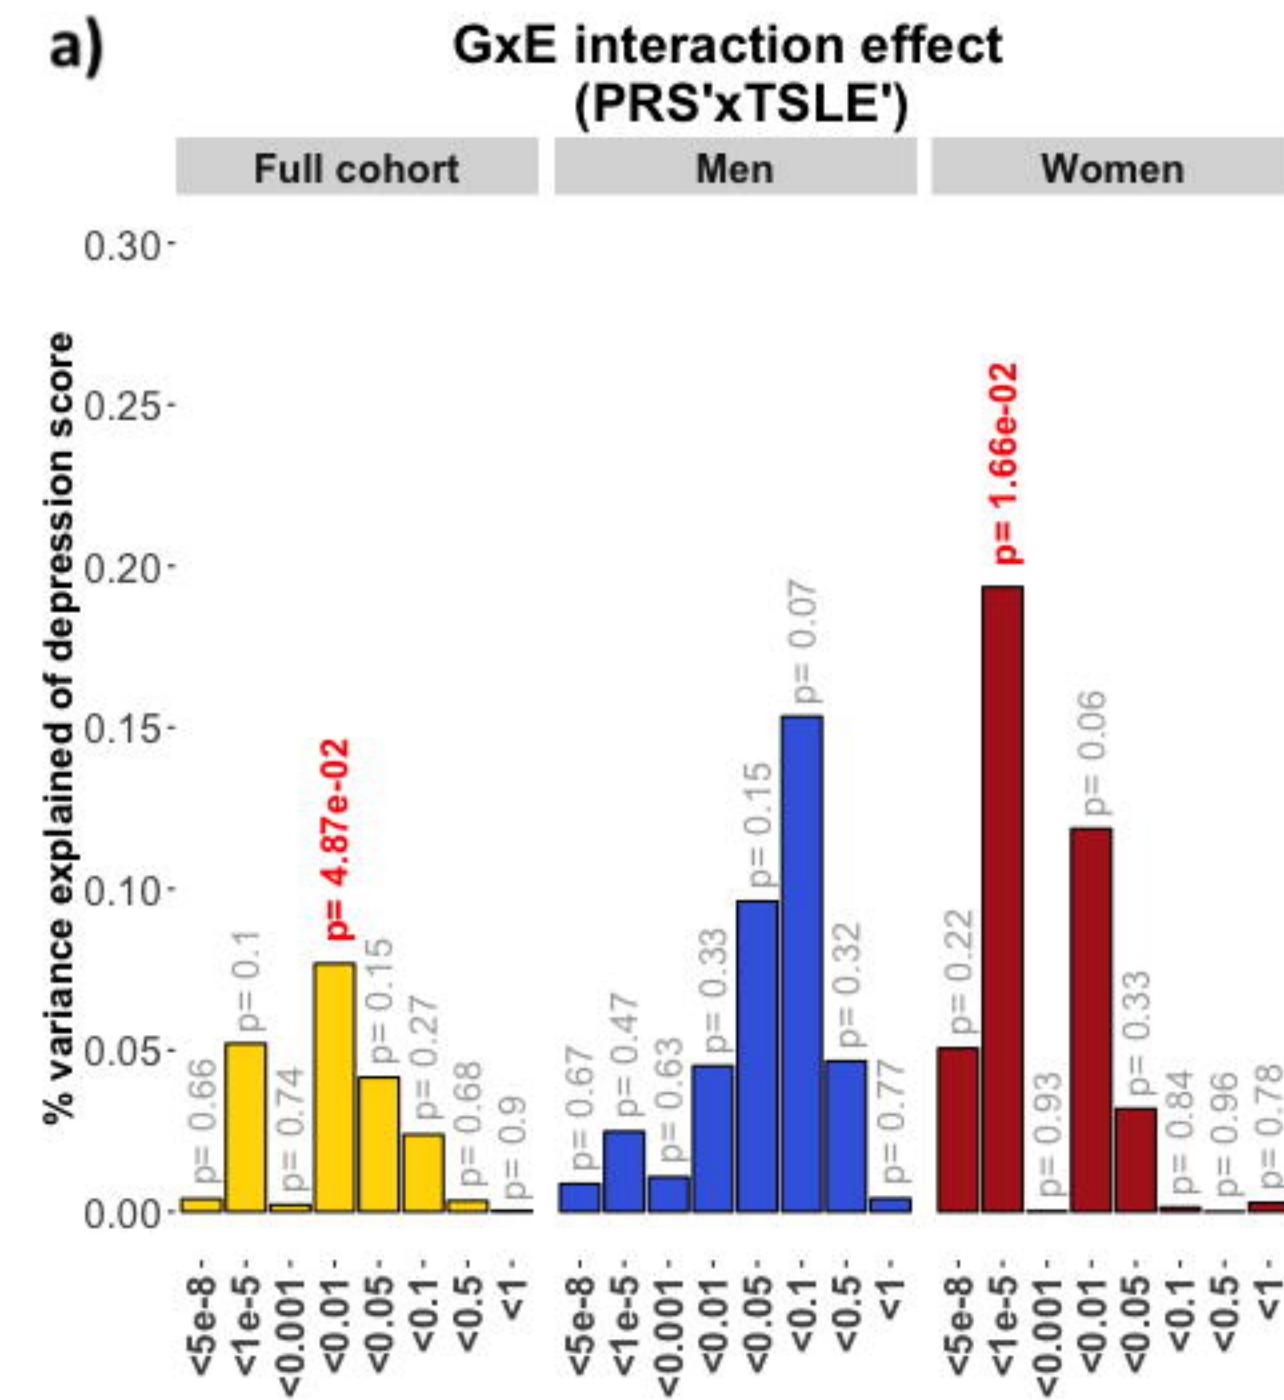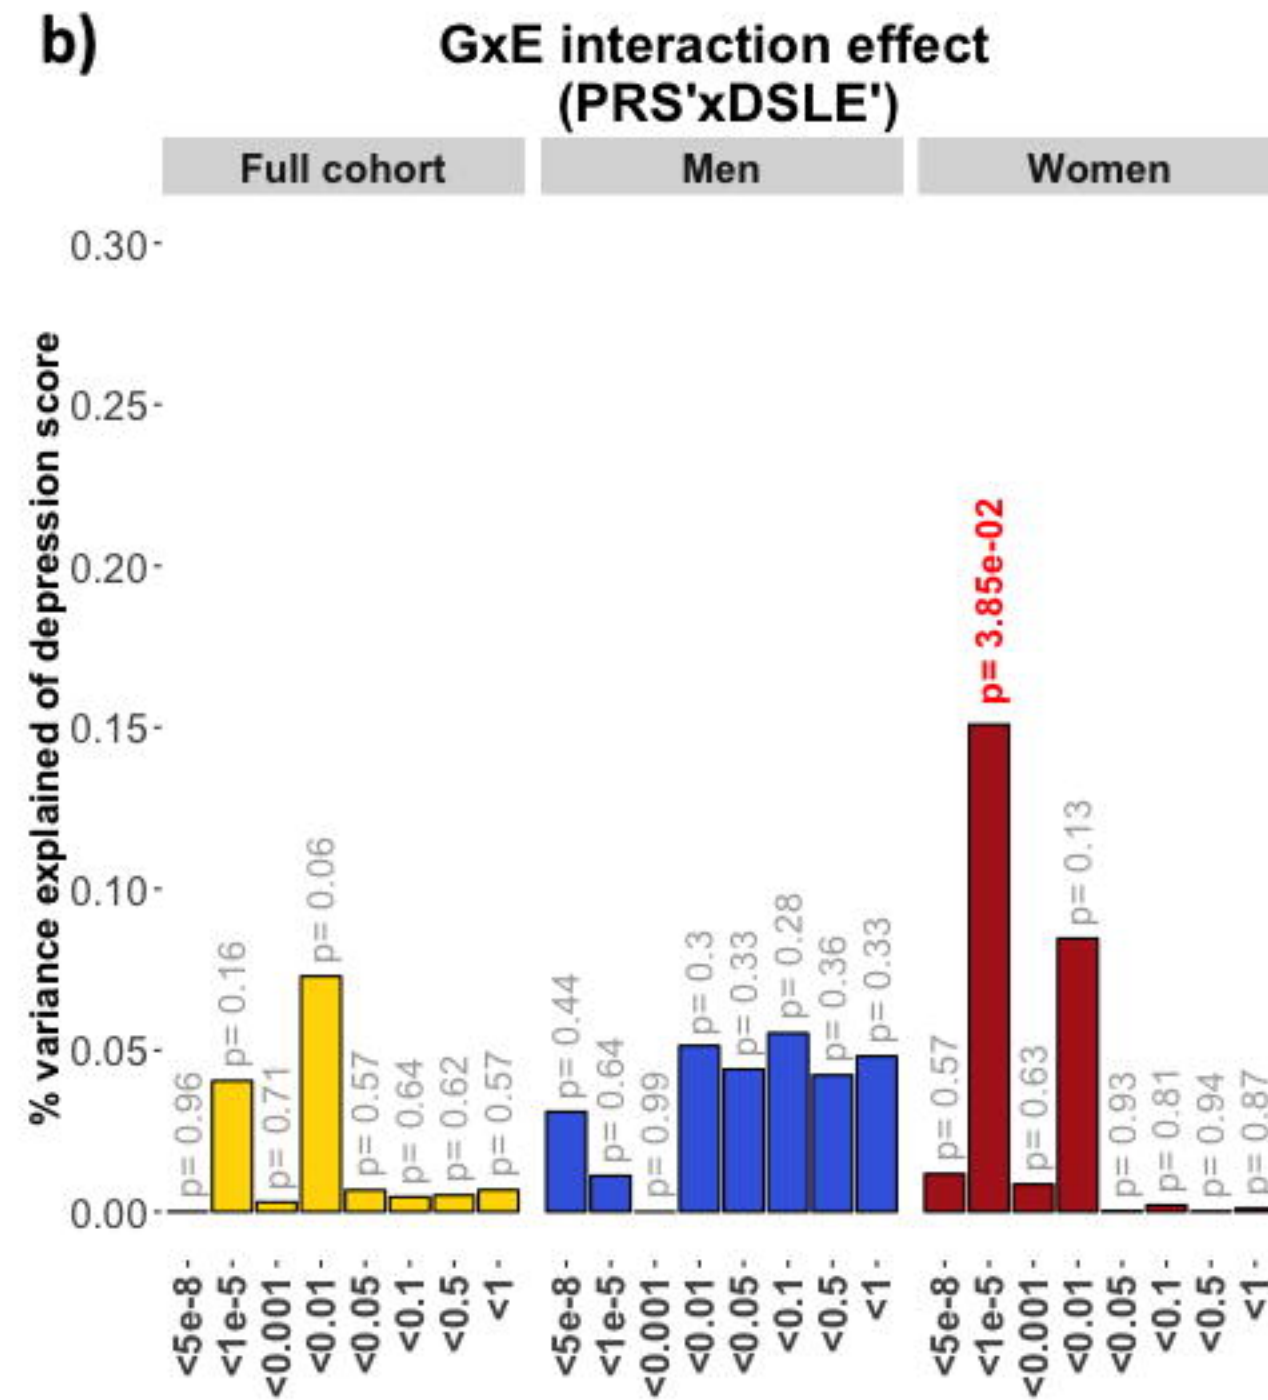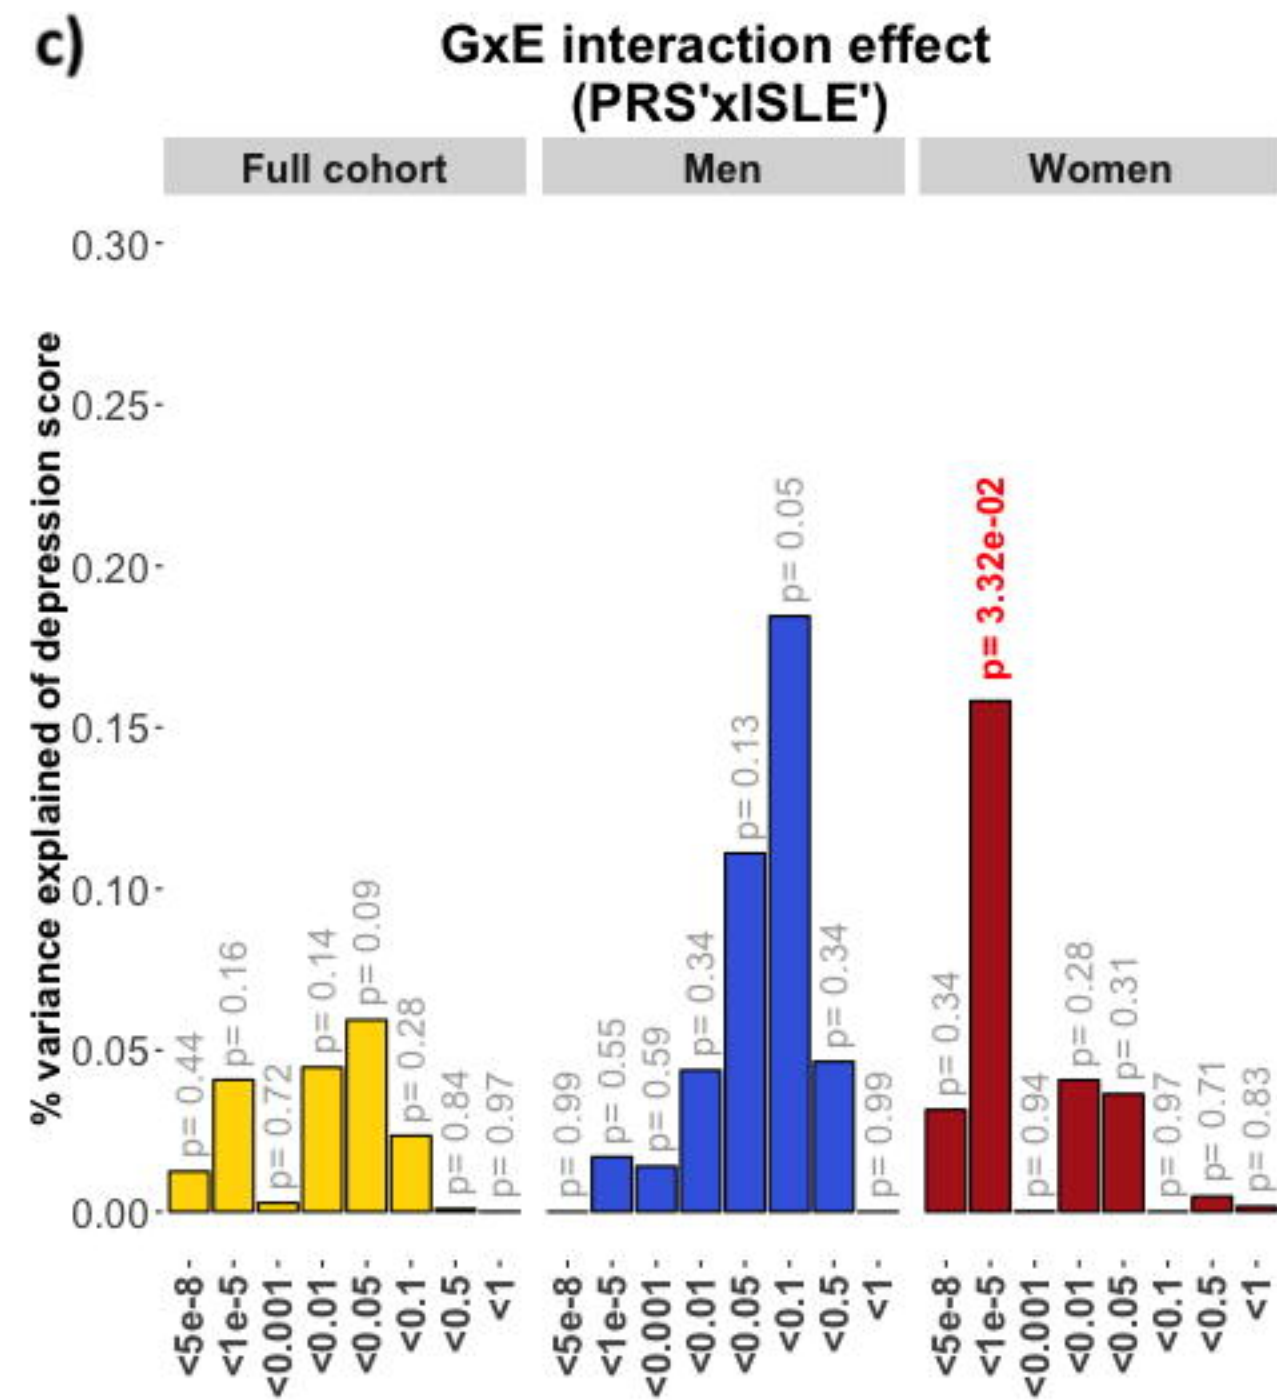

**a)**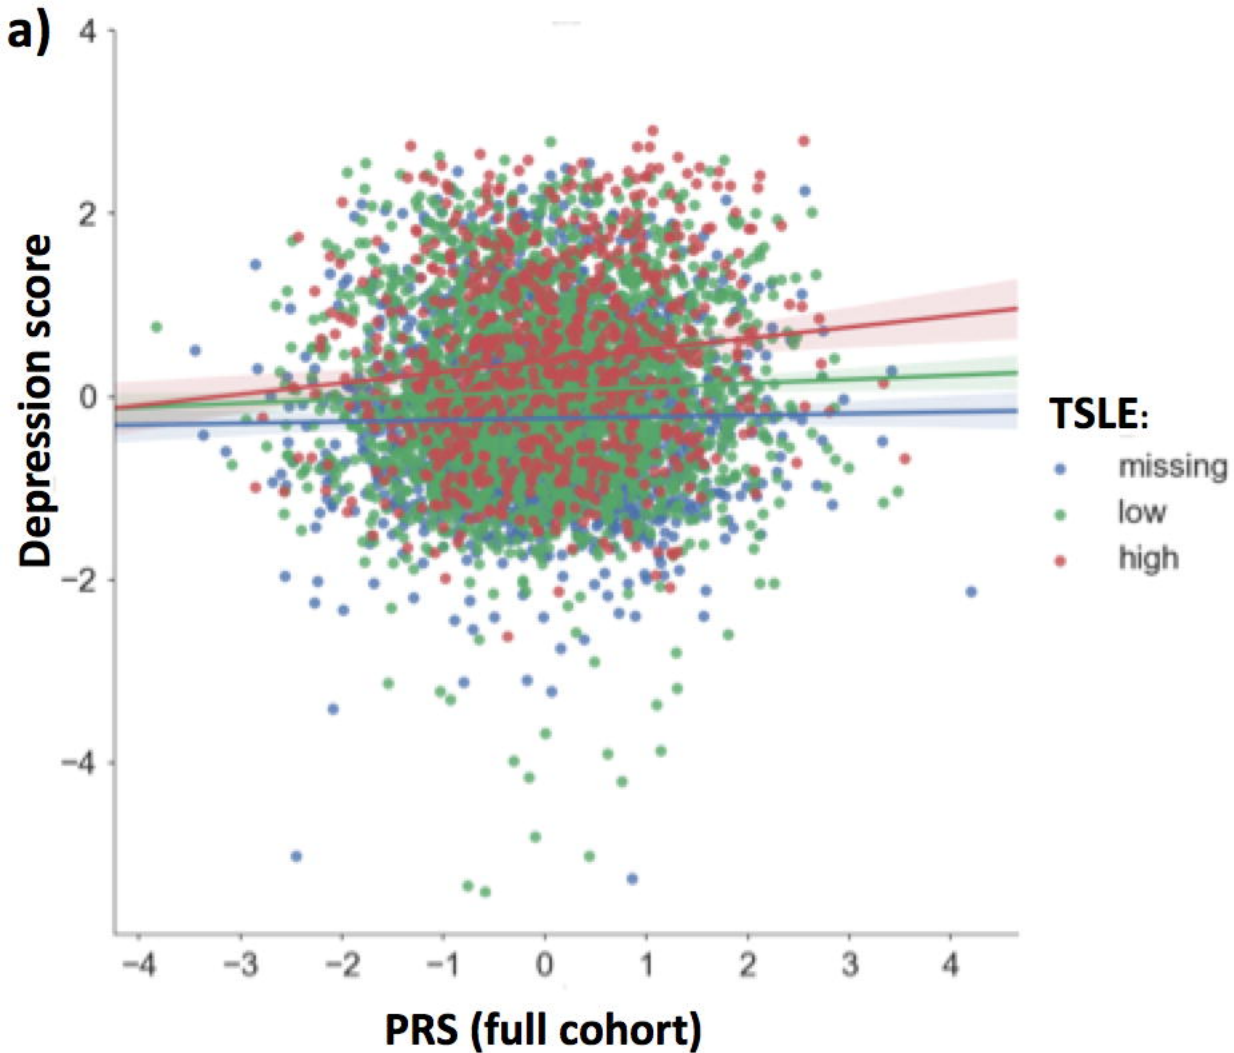**b)**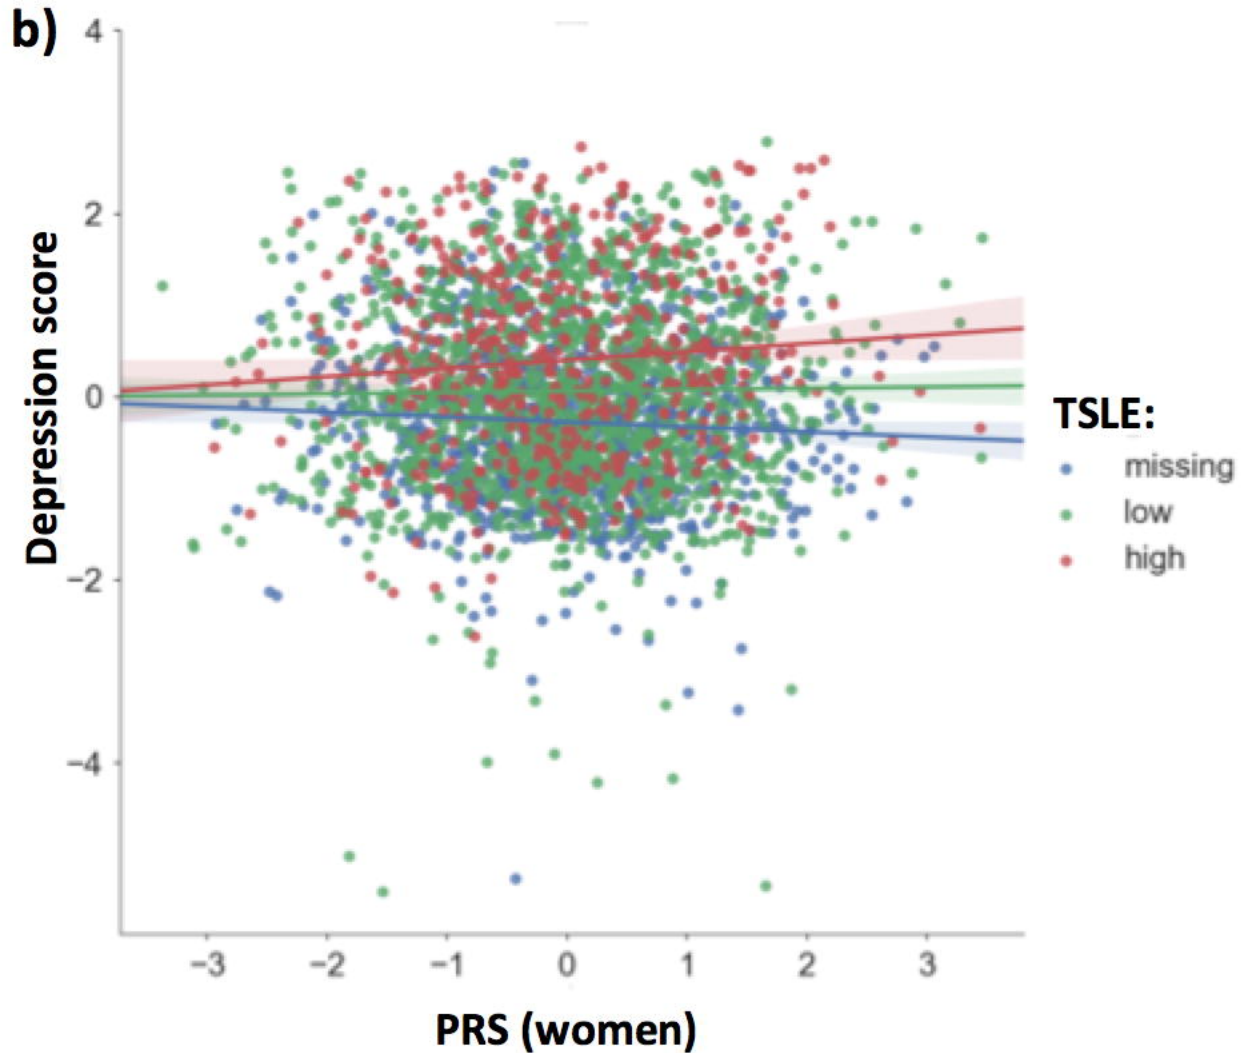

Source: https://www.biorxiv.org/content/10.1101/389494v1.full.pdf
