1 **A validation of the diathesis-stress model for depression in**  
2 **Generation Scotland.**

3  
4 Running title: **The diathesis-stress model for depression in Generation Scotland.**

5  
6 Aleix Arnau-Soler<sup>1</sup>, Mark J. Adams<sup>2</sup>, Toni-Kim Clarke<sup>2</sup>, Donald J. MacIntyre<sup>2</sup>, Keith  
7 Milburn<sup>3</sup>, Lauren Navrady<sup>2</sup>, Generation Scotland<sup>4</sup>, Major Depressive Disorder Working  
8 Group of the Psychiatric Genomics Consortium<sup>5</sup>, Caroline Hayward<sup>6</sup>, Andrew  
9 McIntosh<sup>2,7</sup>, Pippa A. Thomson<sup>1,7</sup>

10

11 <sup>1</sup> Medical Genetics Section, University of Edinburgh, Centre for Genomic and Experimental Medicine and  
12 MRC Institute of Genetics and Molecular Medicine, Edinburgh, UK.

13 <sup>2</sup> Division of Psychiatry, Deanery of Clinical Sciences, University of Edinburgh, Royal Edinburgh Hospital,  
14 Morningside Park, Edinburgh EH10 5HF, UK.

15 <sup>3</sup> Health Informatics Centre, University of Dundee, UK.

16 <sup>4</sup> A collaboration between the University Medical School and NHS in Aberdeen, Dundee, Edinburgh and  
17 Glasgow, Scotland, UK.

18 <sup>5</sup> For a full list of MDD working group of the PGC investigators, see the Supplementary Material

19 <sup>6</sup> Medical Research Council Human Genetics Unit, Institute of Genetics and Molecular Medicine,  
20 University of Edinburgh, Edinburgh, UK.

21 <sup>7</sup> Centre for Cognitive Ageing and Cognitive Epidemiology, University of Edinburgh, Edinburgh, UK.

22

23 Correspondence should be addressed to: P. Thomson ([Pippa.Thomson@ed.ac.uk](mailto:Pippa.Thomson@ed.ac.uk)) or A. Arnau-  
24 Soler ([aleix.arnau.soler@igmm.ed.ac.uk](mailto:aleix.arnau.soler@igmm.ed.ac.uk))

25

26 Centre for Genomic and Experimental Medicine

27 Institute of Genetics and Molecular Medicine

28 University of Edinburgh

29 Western General Hospital

30 Crewe Road South

31 Edinburgh, EH4 2XU, UK

32 Phone: +44(0)1316518756

33

34 Abstract: 250

35 Main body (excl. abstract): 4 730

36 No. Tables: 1

37 No. Figures: 3

38 No. References: 73

39 Supplementary Information: 1 file

40       Supplementary Tables: 1

41       Supplementary Figures: 2

42 **ABSTRACT**

43 Depression has well-established influences from genetic and environmental risk  
44 factors. This has led to the *diathesis-stress* theory, which assumes a multiplicative  
45 gene-by-environment interaction (GxE) effect on risk. Recently, *Colodro-Conde et al.*  
46 empirically tested this theory, using the polygenic risk score for major depressive  
47 disorder (PRS, genes) and stressful life events (SLE, environment) effects on depressive  
48 symptoms, identifying significant GxE effects with an additive contribution to liability.  
49 We have tested the *diathesis-stress* theory on an independent sample of 4 919  
50 individuals.

51 We identified nominally significant positive GxE effects in the full cohort ( $R^2 = 0.08\%$ ,  $p$   
52  $= 0.049$ ) and in women ( $R^2 = 0.19\%$ ,  $p = 0.017$ ), but not in men ( $R^2 = 0.15\%$ ,  $p = 0.07$ ).  
53 GxE effects were nominally significant, but only in women, when SLE were split into  
54 those in which the respondent plays an active or passive role ( $R^2 = 0.15\%$ ,  $p = 0.038$ ;  $R^2$   
55  $= 0.16\%$ ,  $p = 0.033$ , respectively). High PRS increased the risk of depression in  
56 participants reporting high numbers of SLE ( $p = 2.86 \times 10^{-4}$ ). However, in those  
57 participants who reported no recent SLE, a higher PRS appeared to increase the risk of  
58 depressive symptoms in men ( $\beta = 0.082$ ,  $p = 0.016$ ) but had a protective effect in  
59 women ( $\beta = -0.061$ ,  $p = 0.037$ ). This difference was nominally significant ( $p = 0.017$ ).

60 Our study reinforces the evidence of additional risk in the aetiology of depression due  
61 to GxE effects. However, larger sample sizes are required to robustly validate these  
62 findings.

## 63 INTRODUCTION

64 Stressful life events (SLE) have been consistently recognized as a determinant of  
65 depressive symptoms, with many studies reporting significant associations between  
66 SLE and major depressive disorder (MDD)<sup>1-7</sup>. Some studies suggest that severe  
67 adversity is present before the onset of illness in over 50% of individuals with  
68 depression<sup>8</sup> and may characterize a subtype of cases<sup>9</sup>. However, some individuals  
69 facing severe stress never present symptoms of depression<sup>10</sup>. This has led to a  
70 suggestion that the interaction between stress and an individual's vulnerability, or  
71 *diathesis*, is a key element in the development of depressive symptoms. Such  
72 vulnerability can be conceived as a set of biological factors that predispose to illness.  
73 Several *diathesis-stress* models have been successfully applied across many  
74 psychopathologies<sup>11-15</sup>.

75 The *diathesis-stress* model proposes that a latent *diathesis* may be activated by stress  
76 before psychopathological symptoms manifest. Some levels of *diathesis* to illness are  
77 present in everybody, with a threshold over which symptoms will appear. Exceeding  
78 such a threshold depends on the interaction between *diathesis* and the degree of  
79 adversity faced in SLE, which increases the liability to depression beyond the combined  
80 additive effects of the *diathesis* and stress alone<sup>11</sup>. Genetic risk factors can, therefore,  
81 be conceived as a genetic *diathesis*. Thus, this genetically driven effect produced by  
82 the *diathesis-stress* interaction can be seen as a gene-by-environment interaction  
83 (GxE).

84 MDD is characterized by a highly polygenic architecture, composed of common  
85 variants with small effect and/or rare variants<sup>16</sup>. Therefore, interactions in depression  
86 are also expected to be highly polygenic. In recent years, with the increasing success of

87 genome-wide association studies, GxE studies in depression have shifted towards  
88 hypothesis-free genome-wide and polygenic approaches that capture liability to  
89 depression using genetic data<sup>17-25</sup>. Recent advances in genomics and the massive effort  
90 from national institutions to collect genetic, clinical and environmental data on large  
91 population-based samples now provide an opportunity to empirically test the  
92 *diathesis-stress* model for depression. The construction of polygenic risk scores (PRS)  
93 offers a novel paradigm to quantify genetic *diathesis* into a single genetic measure,  
94 allowing us to study GxE effects with more predictive power than any single variant<sup>26-</sup>  
95 <sup>29</sup>. PRS are genetic indicators of the aggregate number of risk alleles carried by an  
96 individual weighted by their allelic effect estimated from genome-wide association  
97 studies. This polygenic approach to assessing the *diathesis-stress* model for depression  
98 has been tested using either childhood trauma<sup>17,19,25</sup> or adult SLE<sup>18,23,25</sup> as measures of  
99 environmental adversity.

100 Recently, Colodro-Conde *et al.*<sup>23</sup> provided a direct test of the *diathesis-stress* model for  
101 recent SLE and depressive symptoms. In this study, Colodro-Conde *et al.* used PRS  
102 weighted by the most recent genome-wide meta-analysis conducted by the Psychiatric  
103 Genetics Consortium (PGC; N = 159 601), and measures of three environmental  
104 exposures: lack of social support, “personal” SLE, and “network” SLE. Colodro-Conde  
105 *et al.* reported a significant additive risk on liability to depression due to a GxE effect in  
106 individuals who combine a high genetic predisposition to MDD and a high number of  
107 reported “personal” SLE, mainly driven by effects in women. A significant effect of  
108 interaction was not detected in males. They found no significant interaction between  
109 the genetic *diathesis* and “network” SLE or social support. They concluded that the  
110 effect of stress on risk of depression was dependent on an individual’s *diathesis*, thus

111 supporting the *diathesis-stress* theory. In addition, they suggested possible sex-specific  
112 differences in the aetiology of depression. However, Colodro-Conde *et al.* findings  
113 have not, to our knowledge, been independently validated.

114 In the present study we aim to test the *diathesis-stress* model in an independent  
115 sample of 4 919 unrelated white British participants from a further longitudinal follow-  
116 up from Generation Scotland and assess the differences between women and men,  
117 using self-reported depressive symptoms and recent SLE.

## 118 MATERIALS AND METHODS

### 119 Sample description

120 Generation Scotland is a family-based population cohort recruited throughout  
121 Scotland by a cross-disciplinary collaboration of Scottish medical schools and the  
122 National Health Service (NHS) between 2006 and 2011<sup>30</sup>. At baseline, blood and  
123 salivary DNA samples from Generation Scotland participants were collected, stored  
124 and genotyped at the Wellcome Trust Clinical Research Facility, Edinburgh. Genome-  
125 wide genotype data were generated using the Illumina HumanOmniExpressExome-8  
126 v1.0 DNA Analysis BeadChip (San Diego, CA, USA) and Infinium chemistry<sup>31</sup>. The  
127 procedures and further details for DNA extraction and genotyping have been  
128 extensively described elsewhere<sup>32,33</sup>. In 2014, 21 525 participants from Generation  
129 Scotland eligible for re-contact were sent self-reported questionnaires as part of a  
130 further longitudinal assessment funded by a Wellcome Trust Strategic Award  
131 “STratifying Resilience and Depression Longitudinally” (STRADL)<sup>34</sup> to collect new and  
132 updated mental health questionnaires including psychiatric symptoms and SLE  
133 measures. 9 618 re-contacted participants from Generation Scotland agreed to provide  
134 new measures to the mental health follow-up<sup>34</sup> (44.7% response rate). Duplicate  
135 samples, those showing sex discrepancies with phenotypic data, or that had more than  
136 2% missing genotype data, were removed from the sample, as were samples identified  
137 as population outliers in principal component analysis (mainly non-Caucasians and  
138 Italian ancestry subgroup). In addition, individuals with diagnoses of bipolar disorder,  
139 or with missing SLE data, were excluded from the analyses. SNPs with more than 2% of  
140 genotypes missing, Hardy-Weinberg Equilibrium test  $p < 1 \times 10^{-6}$ , or a minor allele  
141 frequency lower than 1%, were excluded. Individuals were then filtered by degree of

142 relatedness ( $\pi\text{-hat} < 0.05$ ) using PLINK v1.9<sup>35</sup>, maximizing retention of those  
143 participants reporting higher numbers of SLE (see phenotype assessment below). After  
144 quality control, the final dataset comprised 4 919 unrelated individuals of European  
145 ancestry and 560 351 SNPs (mean age at questionnaire: 57.2, s.d. = 12.2, range 22-95;  
146 *women*:  $n = 2\ 990$  - 60.8%, mean age 56.1, s.d. = 12.4; *men*:  $n = 1\ 929$  - 39.2%, mean  
147 age 58.7, s.d. = 11.8). Further details on the recruitment procedure and Generation  
148 Scotland profile are described in detail elsewhere<sup>30,32,36-38</sup>. All participants provided  
149 written consent. All components of Generation Scotland and STRADL obtained ethical  
150 approval from the Tayside Committee on Medical Research Ethics on behalf of the  
151 National Health Service (reference 05/s1401/89). Generation Scotland data is available  
152 to researchers on application to the Generation Scotland Access Committee  
153 ([access@generationscotland.org](mailto:access@generationscotland.org)).

154

### 155 **Phenotype assessment**

156 Participant self-reported current depressive symptoms through the 28-item scaled  
157 version of The General Health Questionnaire<sup>39,40</sup>. The General Health Questionnaire is  
158 a reliable and validated psychometric screening tool to detect common psychiatric and  
159 non-psychotic conditions (General Health Questionnaire Cronbach alpha coefficient:  
160  $0.82 - 0.86$ )<sup>41</sup>. This consists of 28 items designed to identify whether an individual's  
161 current mental state has changed over the last 2 weeks from their typical state. The  
162 questionnaire captures core symptoms of depression through subscales for severe  
163 depression, emotional (e.g. anxiety and social dysfunction) and somatic symptoms  
164 linked to depression. These subscales are highly correlated<sup>42</sup> and suggest an overall  
165 general factor of depression<sup>43</sup>. Participants rated the 28 items on a four-point Likert

166 scale from 0 to 3 to assess its degree or severity<sup>41</sup> (e.g., *Have you recently felt that life*  
167 *is entirely hopeless?* “Not at all”, “No more than usual”, “Rather more than usual”,  
168 “Much more than usual”), resulting on an 84-point scale depression score. The Likert  
169 scale, which provides a wider and smoother distribution<sup>41</sup>, could be more sensitive to  
170 detect changes in mental status in those participants with chronic conditions or  
171 chronic stress who may feel their current symptoms as “usual”<sup>44</sup>, and to detect  
172 psychopathology changes as response to stress. The final depression score was log  
173 transformed to reduce the effect of positive skew and provide a better approximation  
174 to a normal distribution. In addition, participants completed the Composite  
175 International Diagnostic Interview–Short Form, which diagnoses lifetime history of  
176 MDD according to DSM-IV criteria<sup>45</sup>. The depression score predicted lifetime history of  
177 MDD (odd ratio = 1.91, 95% confidence intervals 1.80-2.02,  $p = 1.55 \times 10^{-102}$ ,  $N = 8$   
178 994), with a 3.8-fold increased odd of having a lifetime history of MDD between  
179 participants in the top and bottom deciles, thus supporting the usefulness of the  
180 depression score in understanding MDD. For a better interpretation, we scaled the  
181 depression score to a mean of 0 when required (Figure 3).

182 Data from a self-reported questionnaire based on the List of Threatening Experiences<sup>46</sup>  
183 was used to construct a measure of common SLE over the previous 6 months. The List  
184 of Threatening Experiences is a reliable psychometric device to measure psychological  
185 “stress”<sup>47,48</sup>. It consists of a 12-item questionnaire to assess SLE with considerable  
186 long-term contextual effects (e.g., *Over last 6 months, did you have a serious problem*  
187 *with a close friend, neighbour or relatives?*). A final score reflecting the total number of  
188 SLE (TSLE) ranging from 0 to 12 was constructed by summing the “yes” responses.  
189 Additionally, TSLE was split into two categories based on those items measuring SLE in



190 which the individual may play and active role exposure to SLE, and therefore in which  
191 the SLE is influenced by genetic factors and thus subject to be “dependent” on an  
192 individual’s own behaviour or symptoms (DSLE; 6 items, e.g., *a serious problem with a*  
193 *close friend, neighbour or relatives* may be subject to a respondent’s own behaviour),  
194 or SLE that are not influenced by genetic factors, likely to be “independent” on a  
195 participant’s own behaviour (ISLE; 5 items, e.g., *a serious illness, injury or assault*  
196 *happening to a close relative* is potentially independent of a respondent’s own  
197 behaviour)<sup>46,49</sup>. The item “*Did you/your wife or partner give birth?*” was excluded from  
198 this categorization. In addition, SLE reported were categorized to investigate the  
199 *diathesis* effect at different levels of exposure, including a group to test the *diathesis*  
200 effect when SLE is not reported. 3 levels of SLE reported were defined (0 SLE = “none”,  
201 1 or 2 SLE = “low”, and 3 or more SLE = “high”) to retain a large enough sample size for  
202 each group to allow meaningful statistical comparison.

203

#### 204 **Polygenic profiling & statistical analysis**

205 Polygenic risk scores (PRS) were generated by PRSice<sup>50</sup>, whose functionality relies  
206 mostly on PLINK v1.9<sup>35</sup>, and were calculated using the genotype data of Generation  
207 Scotland participants (i.e. target sample) and summary statistics for MDD from the  
208 PGC-MDD2 GWAS release (July 2016, discovery sample) used by Colodro-Conde *et*  
209 *al.*<sup>23</sup>, with the added contribution from QIMR cohort and the exclusion of Generation  
210 Scotland participants, resulting in summary statistics for MDD derived from a sample  
211 of 50 455 cases and 105 411 controls.

212 Briefly, PRSice removed strand-ambiguous SNPs and clump-based pruned ( $r^2 = 0.1$ ,  
213 within a 10Mb window) our target sample to obtain the most significant independent

214 SNPs in approximate linkage equilibrium. Independent risk alleles were then weighted  
215 by the allelic effect sizes estimated in the independent discovery sample and  
216 aggregated into PRS. PRS were generated for eight  $p$  thresholds ( $p$  thresholds:  $< 5 \times 10^{-8}$ ,  
217  $< 1 \times 10^{-5}$ ,  $< 0.001$ ,  $< 0.01$ ,  $< 0.05$ ,  $< 0.1$ ,  $< 0.5$ ,  $\leq 1$ ) determined by the discovery  
218 sample and standardized (See Supplementary Table 1 for summary of PRS).

219 A genetic relationship matrix (GRM) was calculated for each dataset (i.e. *full cohort*,  
220 *women* and *men*) using GCTA1.26.0<sup>51</sup>. Mixed linear models using the GRM were used  
221 to estimate the variance in depression score explained by PRS, SLEs and their  
222 interaction; and stratified by sex. 20 principal components were calculated for the  
223 datasets.

224 The mixed linear model used to assess the effects of PRS is as follows:

$$\text{Depression} = \beta_0 + \beta_1 \text{PRS} + \text{GRM} + \text{Covariates}$$

225 Mixed linear models used to assess the effect of the stressors are as follows:

$$\text{Depression} = \beta_0 + \beta_1 \text{TSLE} + \text{GRM} + \text{Covariates}$$

$$\text{Depression} = \beta_0 + \beta_1 \text{DSLE} + \text{GRM} + \text{Covariates}$$

$$\text{Depression} = \beta_0 + \beta_1 \text{ISLE} + \text{GRM} + \text{Covariates}$$

226 Following Colodro-Conde *et al.*<sup>23</sup>, covariates (i.e. age, age<sup>2</sup>, sex, age-by-sex and age<sup>2</sup>-  
227 by-sex interactions, and 20 principal components) were regressed from PRS (PRS') and  
228 SLE scores (i.e. TSLE', DSLE' and ISLE'; SLEs') before fitting models in GCTA to guard  
229 against confounding influences on the PRS-by-SLEs interactions<sup>52</sup>. PRS' and SLEs' were  
230 standardized to a mean of 0 and a standard deviation of 1. The Mixed linear models  
231 (i.e. the *diathesis-stress* model) used to assess GxE effects are as follows:

$$\text{Depression} = \beta_0 + \beta_1 \text{PRS}' + \beta_2 \text{TSLE}' + \beta_3 \text{PRS}' \times \text{TSLE}' + \text{GRM} + \text{Covariates}$$

$$\text{Depression} = \beta_0 + \beta_1 \text{PRS}' + \beta_2 \text{DSLE}' + \beta_3 \text{PRS}' \times \text{DSLE}' + \text{GRM} + \text{Covariates}$$

$$Depression = \beta_0 + \beta_1 PRS' + \beta_2 ISLE' + \beta_3 PRS' \times ISLE' + GRM + Covariates$$

232 Covariates fitted in the models above were age, age<sup>2</sup>, sex, age-by-sex, age<sup>2</sup>-by-sex and  
233 20 principal components. Sex and its interactions (age-by-sex and age<sup>2</sup>-by-sex) were  
234 omitted from the covariates when stratifying by sex. All parameters from the models  
235 were estimated using GCTA and the significance of the effect ( $\beta$ ) from fixed effects  
236 assessed using a Wald test. The significance of main effects (PRS and SLEs) allowed for  
237 nominally testing the significance of interactions at  $p$ -threshold = 0.05. To account for  
238 multiple testing correction, a Bonferroni's adjustment correcting for 8 PRS and 3  
239 measures of SLE tested (24 tests) was used to establish a robust threshold for  
240 significance at  $p = 2.08 \times 10^{-3}$ .

241 The PRS effect on depression score at different levels of exposure was further  
242 examined for the detected nominally significant interactions by categorizing  
243 participants on three groups based on the number of SLE reported (i.e. "none", "low"  
244 or "high"). Using linear regression, we applied a least squares approach to assess PRS'  
245 effects on the depression score in each SLE category. Further conservative Bonferroni  
246 correction to adjust for the 3 SLE categories tested established a threshold for  
247 significance of  $p = 6.94 \times 10^{-4}$ .

248 Differences on the estimated size of GxE effect between women and men were  
249 assessed by comparing a z-score to the standard normal distribution ( $\alpha = 0.05$ , one-  
250 tailed). Z-scores were derived from GxE estimates ( $\beta$ ) and standard errors (SE)  
251 detected in women and men as follows:

$$Z - \text{score} = \frac{\beta_{\text{women}} - \beta_{\text{men}}}{\sqrt{SE(\beta_{\text{women}})^2 + SE(\beta_{\text{men}})^2}}$$

252

253 **RESULTS**

254 PRS for MDD significantly predicted the depression score across the whole sample ( $\beta =$   
255  $0.080$ ,  $s.e. = 0.014$ ,  $p = 7.53 \times 10^{-9}$ ) explaining 0.64% of the variance at its best  $p$ -  
256 threshold ( $p$ -threshold = 0.1; Figure 1a). Stratifying by sex, PRS significantly predicted  
257 the depression score in both sexes, explaining 0.59% in men and 0.67% in women  
258 (*men*:  $p$ -threshold = 0.1,  $\beta = 0.077$ ,  $s.e. = 0.022$ ,  $p = 2.09 \times 10^{-4}$ ; *women*:  $p$ -threshold =  
259 0.1,  $\beta = 0.082$ ,  $s.e. = 0.018$ ,  $p = 4.93 \times 10^{-6}$ ; Figure 1a). Self-reported SLE over the last 6  
260 months (TSLE, mean = 1.3 SLE,  $s.d. = 1.5$ ) also significantly predicted depression score  
261 for the whole sample and stratified by sex (*full cohort*: variance explained = 4.91%,  $\beta =$   
262  $0.222$ ,  $s.e. = 0.014$ ,  $p = 9.98 \times 10^{-59}$ ; *men*: 4.19%,  $\beta = 0.205$ ,  $s.e. = 0.021$ ,  $p = 2.23 \times 10^{-22}$ ;  
263 *women*: 5.33%,  $\beta = 0.231$ ,  $s.e. = 0.018$ ,  $p = 7.48 \times 10^{-38}$ ; Figure 1b). Overall, significant  
264 additive contributions from genetics and SLE in depression score were detected in all  
265 participants and across sexes. There was no significant difference in the direct effect of  
266 TSLE between women and men ( $p = 0.17$ ). However, the variance in depression score  
267 explained by the TSLE appeared to be lower than the variance explained by the  
268 measure of personal SLE (PSLE) used in Colodro-Conde *et al.*<sup>23</sup> (12.9%). This may, in  
269 part, be explained by different contributions of dependent and independent SLE items  
270 screened in Colodro-Conde *et al.* compared to our study. Although questions about  
271 dependent SLE (DSLE, mean = 0.4 SLE) represented over 28% of the TSLE-items  
272 reported in our study, the main effect of DSLE explained approximately 93% of the  
273 amount of variance explained by TSLE (*full cohort*: variance explained = 4.56%,  $\beta =$   
274  $0.212$ ,  $s.e. = 0.014$ ,  $p = 1.73 \times 10^{-54}$ ; *men*: 3.74%,  $\beta = 0.193$ ,  $s.e. = 0.021$ ,  $p = 9.66 \times 10^{-21}$ ;  
275 *women*: 5.07%,  $\beta = 0.225$ ,  $s.e. = 0.018$ ,  $p = 8.09 \times 10^{-35}$ ; Figure 1b). Independent SLE  
276 (ISLE, mean = 0.85 SLE), which represented over 69% of TSLE-items, explained

277 approximately 57% of the amount of variance explained by TSLE (*full cohort*: variance  
278 explained = 2.80%,  $\beta = 0.167$ , s.e. = 0.014,  $p = 1.32 \times 10^{-33}$ ; *men*: 2.44%,  $\beta = 0.156$ , s.e. =  
279 0.022,  $p = 2.88 \times 10^{-13}$ ; *women*: 3.02%,  $\beta = 0.174$ , s.e. = 0.018,  $p = 5.20 \times 10^{-22}$ ; Figure  
280 1b). To explore the contribution from each measure, we combined DSLE and ISLE  
281 together in a single model. DSLE explained 3.34% of the variance of depressive score  
282 compared to 1.45% of the variance being explained by ISLE, suggesting that DSLE have  
283 a greater effect on liability to depressive symptoms than ISLE.

284 A *diathesis-stress* model for depression was tested to assess GxE effects. We detected  
285 significant, albeit weak, GxE effects on depression score (Figure 2). The PRS interaction  
286 with TSLE was nominally significant in the full cohort ( $\beta = 0.028$ , s.e. = 0.014,  $R^2 =$   
287 0.08%,  $p = 0.049$ ) and slightly stronger in women ( $\beta = 0.044$ , s.e. = 0.018,  $R^2 = 0.19\%$ ,  $p$   
288 = 0.017; Figure 2a), compared to men in which the effect was not significant ( $\beta =$   
289 0.039, s.e. = 0.022,  $R^2 = 0.15\%$ ,  $p = 0.07$ ). However, these results did not survive  
290 correction for multiple testing ( $p > 2.08 \times 10^{-3}$ ).

291 The best-fit threshold was much lower in women ( $p$ -threshold =  $1 \times 10^{-5}$ ) compared to  
292 the full sample ( $p$ -threshold = 0.01). The size of GxE across sexes at  $p$ -threshold =  $1 \times$   
293  $10^{-5}$  were significantly different (GxE\*sex  $p = 0.017$ ), but not at the best  $p$ -threshold in  
294 the full cohort ( $p$ -threshold = 0.01, GxE\*sex  $p = 0.32$ ; Figure 2a). In women, GxE effect  
295 with DSLE predicted depression score ( $p$ -threshold =  $1 \times 10^{-5}$ ;  $\beta = 0.039$ , s.e. = 0.019,  $R^2$   
296 = 0.15%,  $p = 0.038$ ; Figure 2b and Supplementary Figure 2a), as did the GxE effect with  
297 ISLE ( $p$ -threshold =  $1 \times 10^{-5}$ ;  $\beta = 0.040$ , s.e. = 0.019,  $R^2 = 0.16\%$ ,  $p = 0.033$ ; Figure 2c and  
298 Supplementary Figure 2b). No significant interaction was detected in men (best-fit  $p$ -  
299 threshold = 0.1) with either TSLE ( $\beta = 0.039$ , s.e. = 0.022,  $R^2 = 0.15\%$ ,  $p = 0.072$ ; Figure

300 2a), DSLE ( $\beta = 0.024$ , s.e. = 0.022,  $R^2 = 0.06\%$ ,  $p = 0.28$ ; Figure 2b) or ISLE ( $\beta = 0.043$ , s.e.  
301 = 0.022,  $R^2 = 0.18\%$ ,  $p = 0.055$ ; Figure 2c).

302 To examine these results further and investigate the *diathesis* effect at different levels  
303 of stress, nominally significant GxE were plotted between PRS and categories of SLE  
304 (i.e., “none”, “low” and “high” SLE reported; Figure 3). Examining the interaction found  
305 at the full cohort (PRS at PGC-MDD GWAS  $p$ -threshold = 0.01), we detected a  
306 significant direct *diathesis* effect on the risk of depressive symptoms in those  
307 participants reporting SLE, with a higher risk when greater numbers of SLE were  
308 reported (“low” number of SLE reported: PRS’  $\beta = 0.043$ , s.e. = 0.021,  $p = 0.039$ ; “high”  
309 number of SLE reported: PRS’  $\beta = 0.142$ , s.e. = 0.039,  $p = 2.86 \times 10^{-4}$ ; see Table 1 and  
310 Figure 3a). Whereas, in participants who reported no SLE over the preceding 6 months,  
311 the risk of depressive symptoms was the same regardless of their *diathesis* risk  
312 (“none” SLE reported: PRS’  $\beta = 0.021$ , s.e. = 0.022,  $p = 0.339$ ). Stratifying these results  
313 by sex, we found the same pattern as in the full cohort in women (“none”:  $p = 0.687$ ;  
314 “low”:  $p = 0.023$ ; “high”:  $p = 2 \times 10^{-3}$ ), but not in men (“none”:  $p = 0.307$ ; “low”:  $p =$   
315  $728$ ; “high”:  $p = 0.053$ ; see Table 1 and Figure 3a). However, the lack of significant  
316 *diathesis* effect in men may be due to their lower sample size and its corresponding  
317 reduced power.

318 Examining the interaction with PRS (at PGC-MDD GWAS  $p$ -threshold =  $1 \times 10^{-5}$ ) with  
319 which a significant interaction was detected in women, we only detected a significant  
320 *diathesis* effect on depression score when stratifying by sex in those participants who  
321 did not reported SLE over the last 6 months (see Table 1). The *diathesis* effect was  
322 positive in men (PRS’  $\beta = 0.082$ , s.e. = 0.034,  $p = 0.016$ ,  $R^2 = 0.7\%$ ; Figure 3b), consistent  
323 with the contribution of risk alleles. Conversely, the *diathesis* effect was negative in

324 women (PRS'  $\beta = -0.061$ , s.e. = 0.029,  $p = 0.037$ ,  $R^2 = 0.4\%$ ; Figure 3b), suggesting a  
325 protective effect of increasing PRS in those women reporting no SLE, and consistent  
326 with the contribution of alleles to individual sensitivity to both positive and negative  
327 environmental effects (i.e. “plasticity alleles” rather than “risk alleles”)<sup>53,54</sup>. This PRS  
328 accounted for the effect of just 34 SNPs, and the size of its GxE across sexes were  
329 significantly different (GxE\*sex  $p = 0.017$ ; Figure 2a), supporting possible differences in  
330 the underlying stress-response mechanisms between women and men.

331 **DISCUSSION**

332 The findings reported in this study support those from Colodro-Conde *et al.*<sup>23</sup>, in an  
333 independent sample of similar sample size and study design, and also supports  
334 possible sex-specific differences in the effect of genetic risk of MDD in response to SLE.  
335 Both Colodro-Conde *et al.* and our study suggest that individuals with an inherent  
336 genetic predisposition to MDD, reporting high number of recent SLE, are at additional  
337 risk of depressive symptoms due to GxE effects, thus validating the *diathesis-stress*  
338 theory. We identified nominally significant GxE effects in liability to depression at the  
339 population level ( $p = 0.049$ ) and in women ( $p = 0.017$ ), but not in men ( $p = 0.072$ ).  
340 However, these interactions did not survive multiple testing correction ( $p > 2.08 \times 10^{-3}$ )  
341 and the power of both studies to draw robust conclusions remains limited<sup>55</sup>. With  
342 increased power these studies could determine more accurately both the presence  
343 and magnitude of a GxE effect in depression. To better understand the effect of PRS at  
344 different levels of exposure to stress, we examined the nominally significant  
345 interactions detected in the full sample by categorizing participants on three groups  
346 based on the number of SLE reported (i.e. “none”, “low” or “high”). We detected a  
347 significant *diathesis* effect on risk of depression only in those participants reporting  
348 SLE, but not in those participants that reported no SLE over the last 6 month.  
349 Furthermore, the *diathesis* effect was stronger on those participants reporting a “high”  
350 number of SLE ( $\beta = 0.142$ ,  $p = 2.86 \times 10^{-4}$ ) compared to those participants reporting a  
351 “low” number of SLE ( $\beta = 0.043$ ,  $p = 0.039$ ). The former effect was robustly significant  
352 and survived a conservative Bonferroni correction to adjust for multiple testing ( $p <$   
353  $6.94 \times 10^{-4}$ ). This finding corroborates the *diathesis-stress* model for depression and  
354 supports Colodro-Conde *et al.* results using an independent sample.



355 To investigate the relative contribution of the GxE to the variance of depression, we  
356 examined in the full cohort the total variance of depression score explained by the PRS  
357 main effect and the significant GxE effect jointly. Together, they explained 0.34% of  
358 the variance, of which 0.07% of the variance of the depression score was attributed to  
359 the GxE effect ( $p$ -threshold = 0.01; PRS  $p = 1.19 \times 10^{-4}$ , GxE  $p = 0.049$ ; both derived  
360 from the full diathesis-model with TSLE). This is lower than the proportion of variance  
361 attributed to common SNPs (8.9%) in the full PGC-MDD analysis<sup>16</sup>. As Colodro-Conde *et*  
362 *al.* noted, this result aligns with estimates from experimental organisms suggesting  
363 that around 20% of the heritability may be typically attributed to the effects of GxE<sup>56</sup>,  
364 although it is inconsistent with the majority of human traits with the potential  
365 exception of depression<sup>57</sup>.

366 Consistent with PRS predicting “personal” SLE in Colodro-Conde *et al.*, PRS for MDD  
367 predicted SLE in our study (see Supplementary Figure 1), although not at the  $p$ -  
368 threshold at which significant GxE effects were detected. Genetic factors predisposing  
369 to MDD may contribute to individuals exposing themselves to, or showing an increased  
370 reporting of, SLE via behavioural or personality traits<sup>58,59</sup>. Such genetic mediation of  
371 the association between depression and SLE would disclose a gene-environment  
372 correlation (i.e. genetic effects on the probability of undergoing a SLE) that hinders to  
373 interpret our findings as pure GxE effects<sup>60,61</sup>. To address this limitation and assess this  
374 aspect, following Colodro-Conde *et al.*, we split the 12-items TSLE measure into SLE  
375 that are either potentially “dependent” on a participant’s own behaviour (DSLE;  
376 therefore, potentially driven by genetic factors) or not (“independent” SLE; ISLE)<sup>46,49</sup>.  
377 DSLE are reported to be more heritable and have stronger associations with MDD than  
378 ISLE<sup>49,62,63</sup>. In our sample, reporting DSLE is significantly heritable ( $h^2_{\text{SNP}} = 0.131$ , s.e. =

379 0.071,  $p = 0.029$ ), supporting a genetic mediation of the association, whereas reporting  
380 ISLE is not significantly heritable ( $h^2_{\text{SNP}} = 0.000$ , s.e. = 0.072,  $p = 0.5$ ). Nominally  
381 significant GxE effects were seen in women for both DSLE and ISLE, suggesting that  
382 both GxE and gene-environment correlation co-occur. Colodro-Conde *et al.* did not  
383 identify significant GxE using independent SLE as the exposure.

384 Between-sex differences on stress response could help to explain previous differences  
385 seen between sexes in depression such as those in associated risk (i.e. approximately  
386 1.5 - 2-fold higher in women), symptoms reported and/or coping strategies (e.g.,  
387 whereas women tend to cope through verbal and emotional strategies, men tend to  
388 cope by doing sport and consuming alcohol)<sup>64-68</sup>. This also aligns with an increased risk  
389 associated with a lack of social support seen in women compared to men<sup>23</sup>.

390 Furthermore, although we do not know whether participants experienced recent  
391 events with positive effects, we saw a protective effect in those women who did not  
392 experienced recent SLE ( $p = 0.037$ ), suggesting that some genetic variants associated  
393 with MDD may operate as “plasticity alleles” and not just as “risk alleles”<sup>53,54</sup>. This  
394 effect was neutralized in the full cohort due to an opposite effect in men ( $p = 0.016$ ),  
395 but it is supported by previous protective effects reported when using a serotonergic  
396 multilocus profile score and absence of SLE in young women<sup>69</sup>. These findings would  
397 be consistent with a differential-susceptibility model<sup>70,71</sup> of depression, also suggested  
398 by the interaction effects seen between the serotonin transporter linked promoter  
399 region gene (5-HTTLPR) locus and family support and liability to adolescent depression  
400 in boys<sup>72</sup>. However, our results and the examples given are only nominally significant  
401 and will require replication in larger samples. Robustly identified sex-specific

402 differences in genetic stress-response could improve personalized treatments and  
403 therapies such as better coping strategies.

404 There are notable differences between our study and Colodro-Conde *et al.* to consider  
405 before accepting our findings as a replication of Colodro-Conde *et al.* results. First,  
406 differences in PRS profiling may have affected replication power. We used the same  
407 equivalent PGC-MDD2 GWAS as discovery sample. However, whereas Colodro-Conde  
408 *et al.* generated PRS in their target sample containing over 9.5M imputed SNP, in this  
409 study we generated PRS in a target sample of over 560K genotyped SNPs (see  
410 Supplementary table 1 for comparison). This potentially results in a less informative  
411 PRS in our study, with less predictive power, although the variance explained by our  
412 PRS was slightly larger (0.64% vs. 0.46%). The size of the discovery sample is key to  
413 constructing an accurate predictive PRS, but to exploit the most of the variants  
414 available may be an asset<sup>55</sup>. Secondly, different screening tools were used to measure  
415 both current depression and recent environmental stressors across the two studies.  
416 Both studies transformed their data, using item response theory or by log-  
417 transformation, to improve the data distribution. However, neither study used  
418 depression scores that were normally distributed. The scale of the instruments used  
419 and their corresponding parameterization to test an interaction could have a direct  
420 effect on the size and significance of their interaction<sup>56,73</sup>; so findings from GxE must  
421 be taken with caution. Furthermore, although both screening methods have been  
422 validated and applied to detect depressive symptoms, different questions may cover  
423 and emphasise different features of the illness, which may result in different outputs.  
424 The same applies to the measurement of environmental stressors in the two studies.  
425 Both covering of a longer time-period and upweighting by “dependent” SLE items may

426 explain the increased explanatory power of “personal” SLE (12.9%) in Colodro-Conde  
427 *et al.* to predict depression score compared to our “total” SLE measure (4.91%). Finally,  
428 the unmeasured aspects of the exposure to SLE or its impact may also contribute to  
429 lack of stronger replication and positive findings.

430 In conclusion, despite differences in the measures used across studies, we saw  
431 concordance and similar patterns between our results and those of Colodro-Conde *et*  
432 *al.*<sup>23</sup>. Our findings are consistent with Colodro-Conde *et al.* and, therefore, add validity  
433 to the *diathesis-stress* theory for depression. Empirically demonstrating the *diathesis-*  
434 *stress* theory for depression would validate recent<sup>20,22,24</sup> and future studies using a  
435 genome-wide approach to identify genetic mechanisms and interactive pathways  
436 involved in GxE underpinning the causative effect of “stress” in the development of  
437 depressive symptoms and mental illness in general. This study adds to our  
438 understanding of gene-by-environment interactions, although larger samples will be  
439 required to confirm differences in *diathesis-stress* effects between women and men.

440 **ACKNOWLEDGMENTS**

441 The 1<sup>st</sup> author AAS is funded by the University of Edinburgh ([www.ed.ac.uk](http://www.ed.ac.uk)) and MRC  
442 for his PhD study at the University of Edinburgh Institute of Genetics and Molecular  
443 Medicine ([www.ed.ac.uk/igmm](http://www.ed.ac.uk/igmm)). DJM acknowledges the financial support of NHS  
444 Research Scotland (NRS) through NHS Lothian. MA is supported by STRADL through a  
445 Wellcome Trust Strategic Award (reference 104036/Z/14/Z). Generation Scotland  
446 received core support from the Chief Scientist Office of the Scottish Government  
447 Health Directorates [CZD/16/6] and the Scottish Funding Council [HR03006]. The  
448 genotyping of the GS:SFHS samples was carried out by the Genetics Core Laboratory at  
449 the Wellcome Trust Clinical Research Facility, Edinburgh, Scotland and was funded by  
450 the Medical Research Council UK and the Wellcome Trust (Wellcome Trust Strategic  
451 Award “STratifying Resilience and Depression Longitudinally” (STRADL) Reference  
452 104036/Z/14/Z). The Major Depressive Disorder Working Group of the Psychiatric  
453 Genomics Consortium depends on the contributions of many parties.

454

455 **FINANCIAL DISCLOSURE**

456 The authors declare no conflict of interest.

457     **REFERENCES**

- 458     1.     Hammen, C. Stress and depression. *Annu Rev Clin Psychol* **1**, 293-319  
459             (2005).
- 460     2.     Kessler, R.C. The effects of stressful life events on depression. *Annu Rev*  
461             *Psychol* **48**, 191-214 (1997).
- 462     3.     Kendler, K.S., Karkowski, L.M. & Prescott, C.A. Causal relationship between  
463             stressful life events and the onset of major depression. *Am J Psychiatry* **156**,  
464             837-41 (1999).
- 465     4.     Paykel, E.S. Life events and affective disorders. *Acta Psychiatr Scand Suppl*,  
466             61-6 (2003).
- 467     5.     Stroud, C.B., Davila, J. & Moyer, A. The relationship between stress and  
468             depression in first onsets versus recurrences: a meta-analytic review. *J*  
469             *Abnorm Psychol* **117**, 206-13 (2008).
- 470     6.     Ensel, W.M., Peek, M.K., Lin, N. & Lai, G. Stress in the life course: a life history  
471             approach. *J Aging Health* **8**, 389-416 (1996).
- 472     7.     Kendler, K.S., Karkowski, L.M. & Prescott, C.A. Stressful life events and major  
473             depression: risk period, long-term contextual threat, and diagnostic  
474             specificity. *J Nerv Ment Dis* **186**, 661-9 (1998).
- 475     8.     Mazure, C.M. Life Stressors as Risk Factors in Depression. *Clinical*  
476             *Psychology: Science and Practice* **5**, 291-313 (1998).
- 477     9.     Lichtenberg, P. & Belmaker, R.H. Subtyping major depressive disorder.  
478             *Psychother Psychosom* **79**, 131-5 (2010).
- 479     10.    Elisei, S., Sciarma, T., Verdolini, N. & Anastasi, S. Resilience and depressive  
480             disorders. *Psychiatr Danub* **25 Suppl 2**, S263-7 (2013).
- 481     11.    Monroe, S.M. & Simons, A.D. Diathesis-stress theories in the context of life  
482             stress research: implications for the depressive disorders. *Psychol Bull* **110**,  
483             406-25 (1991).
- 484     12.    Vogel, F. Schizophrenia genesis: The origins of madness. *American Journal of*  
485             *Human Genetics* **48**, 1218-1218 (1991).
- 486     13.    Mann, J.J., Waternaux, C., Haas, G.L. & Malone, K.M. Toward a clinical model  
487             of suicidal behavior in psychiatric patients. *Am J Psychiatry* **156**, 181-9  
488             (1999).
- 489     14.    Riemann, D. *et al.* The hyperarousal model of insomnia: a review of the  
490             concept and its evidence. *Sleep Med Rev* **14**, 19-31 (2010).
- 491     15.    Bolt, M.A., Helming, L.M. & Tintle, N.L. The Associations between Self-  
492             Reported Exposure to the Chernobyl Nuclear Disaster Zone and Mental  
493             Health Disorders in Ukraine. *Front Psychiatry* **9**, 32 (2018).
- 494     16.    Wray, N.R. & Sullivan, P.F. Genome-wide association analyses identify 44  
495             risk variants and refine the genetic architecture of major depression.  
496             *bioRxiv* (2017).
- 497     17.    Peyrot, W.J. *et al.* Effect of polygenic risk scores on depression in childhood  
498             trauma. *Br J Psychiatry* **205**, 113-9 (2014).
- 499     18.    Musliner, K.L. *et al.* Polygenic risk, stressful life events and depressive  
500             symptoms in older adults: a polygenic score analysis. *Psychol Med* **45**, 1709-  
501             20 (2015).
- 502     19.    Peyrot, W.J. *et al.* Does Childhood Trauma Moderate Polygenic Risk for  
503             Depression? A Meta-analysis of 5765 Subjects From the Psychiatric  
504             Genomics Consortium. *Biol Psychiatry* (2017).

- 505 20. Dunn, E.C. *et al.* Genome-Wide Association Study (Gwas) and Genome-Wide  
506 by Environment Interaction Study (Gweis) of Depressive Symptoms in  
507 African American and Hispanic/Latina Women. *Depress Anxiety* **33**, 265-80  
508 (2016).
- 509 21. Otowa, T. *et al.* The First Pilot Genome-Wide Gene-Environment Study of  
510 Depression in the Japanese Population. *PLoS One* **11**, e0160823 (2016).
- 511 22. Ikeda, M. *et al.* Genome-wide environment interaction between depressive  
512 state and stressful life events. *J Clin Psychiatry* **77**, e29-30 (2016).
- 513 23. Colodro-Conde, L. *et al.* A direct test of the diathesis-stress model for  
514 depression. *Mol Psychiatry* (2017).
- 515 24. Coleman, J.R.I., Eley, T.C. & Breen, G. Genome-wide gene-environment  
516 analyses of depression and reported lifetime traumatic experiences in UK  
517 Biobank. *bioRxiv* (2018).
- 518 25. Mullins, N. *et al.* Polygenic interactions with environmental adversity in the  
519 aetiology of major depressive disorder. *Psychol Med* **46**, 759-70 (2016).
- 520 26. Iyegbe, C., Campbell, D., Butler, A., Ajnakina, O. & Sham, P. The emerging  
521 molecular architecture of schizophrenia, polygenic risk scores and the  
522 clinical implications for GxE research. *Soc Psychiatry Psychiatr Epidemiol* **49**,  
523 169-82 (2014).
- 524 27. McGrath, J.J., Mortensen, P.B., Visscher, P.M. & Wray, N.R. Where GWAS and  
525 epidemiology meet: opportunities for the simultaneous study of genetic and  
526 environmental risk factors in schizophrenia. *Schizophr Bull* **39**, 955-9  
527 (2013).
- 528 28. Plomin, R. Commentary: missing heritability, polygenic scores, and gene-  
529 environment correlation. *J Child Psychol Psychiatry* **54**, 1147-9 (2013).
- 530 29. Wray, N.R. *et al.* Research review: Polygenic methods and their application  
531 to psychiatric traits. *J Child Psychol Psychiatry* **55**, 1068-87 (2014).
- 532 30. Smith, B.H. *et al.* Cohort Profile: Generation Scotland: Scottish Family Health  
533 Study (GS:SFHS). The study, its participants and their potential for genetic  
534 research on health and illness. *Int J Epidemiol* **42**, 689-700 (2013).
- 535 31. Gunderson, K.L. Whole-Genome Genotyping on Bead Arrays. in *DNA*  
536 *Microarrays for Biomedical Research: Methods and Protocols* (ed. Dufva, M.)  
537 197-213 (Humana Press, Totowa, NJ, 2009).
- 538 32. Kerr, S.M. *et al.* Pedigree and genotyping quality analyses of over 10,000  
539 DNA samples from the Generation Scotland: Scottish Family Health Study.  
540 *BMC Med Genet* **14**, 38 (2013).
- 541 33. Nagy, R. *et al.* Exploration of haplotype research consortium imputation for  
542 genome-wide association studies in 20,032 Generation Scotland  
543 participants. *Genome Med* **9**, 23 (2017).
- 544 34. Navrady, L.B. *et al.* Cohort Profile: Stratifying Resilience and Depression  
545 Longitudinally (STRADL): a questionnaire follow-up of Generation Scotland:  
546 Scottish Family Health Study (GS:SFHS). *Int J Epidemiol* (2017).
- 547 35. Purcell, S. *et al.* PLINK: a tool set for whole-genome association and  
548 population-based linkage analyses. *Am J Hum Genet* **81**, 559-75 (2007).
- 549 36. Smith, B.H. *et al.* Generation Scotland: the Scottish Family Health Study; a  
550 new resource for researching genes and heritability. *BMC Med Genet* **7**, 74  
551 (2006).
- 552 37. Fernandez-Pujals, A.M. *et al.* Epidemiology and Heritability of Major  
553 Depressive Disorder, Stratified by Age of Onset, Sex, and Illness Course in

- 554            Generation Scotland: Scottish Family Health Study (GS:SFHS). *PLoS One* **10**,  
555            e0142197 (2015).
- 556    38.    Amador, C. *et al.* Recent genomic heritage in Scotland. *BMC Genomics* **16**,  
557            437 (2015).
- 558    39.    Goldberg, D.P. & Hillier, V.F. A scaled version of the General Health  
559            Questionnaire. *Psychol Med* **9**, 139-45 (1979).
- 560    40.    Sterling, M. General Health Questionnaire - 28 (GHQ-28). *J Physiother* **57**,  
561            259 (2011).
- 562    41.    Goldberg, D.P. *et al.* The validity of two versions of the GHQ in the WHO  
563            study of mental illness in general health care. *Psychol Med* **27**, 191-7 (1997).
- 564    42.    Banks, M.H. Validation of the General Health Questionnaire in a young  
565            community sample. *Psychol Med* **13**, 349-53 (1983).
- 566    43.    Marks, A.D.G., Horrocks, K.A. & Schutte, N.S. Emotional intelligence mediates  
567            the relationship between insecure attachment and subjective health  
568            outcomes. *Personality and Individual Differences* **98**, 188-192 (2016).
- 569    44.    O'Rourke, S., MacHale, S., Signorini, D. & Dennis, M. Detecting psychiatric  
570            morbidity after stroke: comparison of the GHQ and the HAD Scale. *Stroke*  
571            **29**, 980-5 (1998).
- 572    45.    Kessler, R.C., Andrews, G., Mroczek, D., Ustun, B. & Wittchen, H.-U. The  
573            World Health Organization Composite International Diagnostic Interview  
574            short-form (CIDI-SF). *International Journal of Methods in Psychiatric*  
575            *Research* **7**, 171-185 (1998).
- 576    46.    Brugha, T., Bebbington, P., Tennant, C. & Hurry, J. The List of Threatening  
577            Experiences: a subset of 12 life event categories with considerable long-  
578            term contextual threat. *Psychol Med* **15**, 189-94 (1985).
- 579    47.    Brugha, T.S. & Cragg, D. The List of Threatening Experiences: the reliability  
580            and validity of a brief life events questionnaire. *Acta Psychiatr Scand* **82**, 77-  
581            81 (1990).
- 582    48.    Motrico, E. *et al.* Psychometric properties of the List of Threatening  
583            Experiences--LTE and its association with psychosocial factors and mental  
584            disorders according to different scoring methods. *J Affect Disord* **150**, 931-  
585            40 (2013).
- 586    49.    Kendler, K.S., Karkowski, L.M. & Prescott, C.A. The assessment of  
587            dependence in the study of stressful life events: validation using a twin  
588            design. *Psychol Med* **29**, 1455-60 (1999).
- 589    50.    Euesden, J., Lewis, C.M. & O'Reilly, P.F. PRSice: Polygenic Risk Score  
590            software. *Bioinformatics* **31**, 1466-8 (2015).
- 591    51.    Yang, J., Lee, S.H., Goddard, M.E. & Visscher, P.M. GCTA: a tool for genome-  
592            wide complex trait analysis. *Am J Hum Genet* **88**, 76-82 (2011).
- 593    52.    Keller, M.C. Gene x environment interaction studies have not properly  
594            controlled for potential confounders: the problem and the (simple) solution.  
595            *Biol Psychiatry* **75**, 18-24 (2014).
- 596    53.    Belsky, J. & Beaver, K.M. Cumulative-genetic plasticity, parenting and  
597            adolescent self-regulation. *J Child Psychol Psychiatry* **52**, 619-26 (2011).
- 598    54.    Belsky, J. *et al.* Vulnerability genes or plasticity genes? *Mol Psychiatry* **14**,  
599            746-54 (2009).
- 600    55.    Dudbridge, F. Power and predictive accuracy of polygenic risk scores. *PLoS*  
601            *Genet* **9**, e1003348 (2013).



- 602 56. Eaves, L.J., Last, K., Martin, N.G. & Jinks, J.L. A progressive approach to non-  
603 additivity and genotype-environmental covariance in the analysis of human  
604 differences. *British Journal of Mathematical and Statistical Psychology* **30**, 1-  
605 42 (1977).
- 606 57. Polderman, T.J. *et al.* Meta-analysis of the heritability of human traits based  
607 on fifty years of twin studies. *Nat Genet* **47**, 702-9 (2015).
- 608 58. Clarke, T. *et al.* Genetic and environmental determinants of stressful life  
609 events and their overlap with depression and neuroticism [version 1;  
610 referees: 3 approved with reservations]. *Wellcome Open Research* **3**(2018).
- 611 59. Kendler, K.S., Kuhn, J. & Prescott, C.A. The interrelationship of neuroticism,  
612 sex, and stressful life events in the prediction of episodes of major  
613 depression. *Am J Psychiatry* **161**, 631-6 (2004).
- 614 60. Kendler, K.S. & Eaves, L.J. Models for the joint effect of genotype and  
615 environment on liability to psychiatric illness. *Am J Psychiatry* **143**, 279-89  
616 (1986).
- 617 61. Plomin, R., DeFries, J.C. & Loehlin, J.C. Genotype-environment interaction  
618 and correlation in the analysis of human behavior. *Psychol Bull* **84**, 309-22  
619 (1977).
- 620 62. Plomin, R., Lichtenstein, P., Pedersen, N.L., McClearn, G.E. & Nesselroade, J.R.  
621 Genetic influence on life events during the last half of the life span. *Psychol*  
622 *Aging* **5**, 25-30 (1990).
- 623 63. Clarke, T.K. *et al.* Genetic and environmental determinants of stressful life  
624 events and their overlap with depression and neuroticism [version 1;  
625 referees: awaiting peer review]. in *Wellcome Open Research* Vol. 3 %M  
626 10.12688/wellcomeopenres.13893.1 (2018).
- 627 64. Weissman, M.M. *et al.* Sex differences in rates of depression: cross-national  
628 perspectives. *J Affect Disord* **29**, 77-84 (1993).
- 629 65. Van de Velde, S., Bracke, P. & Levecque, K. Gender differences in depression  
630 in 23 European countries. Cross-national variation in the gender gap in  
631 depression. *Soc Sci Med* **71**, 305-13 (2010).
- 632 66. Labonte, B. *et al.* Sex-specific transcriptional signatures in human  
633 depression. *Nat Med* (2017).
- 634 67. Angst, J. *et al.* Gender differences in depression. Epidemiological findings  
635 from the European DEPRES I and II studies. *Eur Arch Psychiatry Clin*  
636 *Neurosci* **252**, 201-9 (2002).
- 637 68. Piccinelli, M. & Wilkinson, G. Gender differences in depression. Critical  
638 review. *Br J Psychiatry* **177**, 486-92 (2000).
- 639 69. Vrshek-Schallhorn, S. *et al.* Additive genetic risk from five serotonin system  
640 polymorphisms interacts with interpersonal stress to predict depression. *J*  
641 *Abnorm Psychol* **124**, 776-90 (2015).
- 642 70. Belsky, J. & Pluess, M. Beyond diathesis stress: differential susceptibility to  
643 environmental influences. *Psychol Bull* **135**, 885-908 (2009).
- 644 71. Belsky, J., Bakermans-Kranenburg, M.J. & van Ijzendoorn, M.H. For Better  
645 and for Worse: Differential Susceptibility to Environmental Influences.  
646 *Current Directions in Psychological Science* **16**, 300-304 (2007).
- 647 72. Li, J.J., Berk, M.S. & Lee, S.S. Differential susceptibility in longitudinal models  
648 of gene-environment interaction for adolescent depression. *Dev*  
649 *Psychopathol* **25**, 991-1003 (2013).

- 650 73. Kang, S.-M. & G. Waller, N. *Moderated Multiple Regression, Spurious*  
651 *Interaction Effects, and IRT*, 87-105 (2005).  
652

653 **FIGURE LEGENDS**

654 **Figure 1. a)** Association between polygenic risk scores (PRS) and depression score  
655 (main effects, one-sided tests). PRS were generated at 8  $p$ -threshold levels using  
656 summary statistics from the Psychiatric Genetic Consortium MDD GWAS (released July  
657 2016) with the exclusion of Generation Scotland participants. The depression score  
658 was derived from The General Health Questionnaire. The Y-axis represents the % of  
659 variance of depression score explained by PRS main effects. The full cohort (yellow)  
660 was split into men (blue) and women (red). In Colodro-Conde *et al.*, PRS for MDD  
661 significantly explained up to 0.46% of depression score in their sample (~0.39% in  
662 women and ~0.70% in men). **b)** Association between reported number of SLE and  
663 depression score (main effect, one-sided tests, results expressed in % of depression  
664 score explained). SLE were self-reported through a brief life-events questionnaire  
665 based on the List of Threatening Experiences and categorized into: total number of SLE  
666 reported (TSLE), “dependent” SLE (DSLE) or “independent” SLE (ISLE). The full cohort  
667 (yellow) was split into men (blue) and women (red). In Colodro-Conde *et al.*,  
668 “personal” SLE significantly explained up to 12.9% of depression score variance in their  
669 sample (~11.5% in women and ~16% in men).

670 **Figure 2.** Association between GxE effect and depression score. The results represent  
671 percentage of depression score explained by the interaction term (two-sided tests)  
672 fitted in linear mixed models to empirically test the *diathesis-stress* model. Red  
673 numbers show significant interactions  $p$ -values. \*Shows significance of difference  
674 between sexes when comparing the size of the estimated GxE effects. The full cohort  
675 (yellow) was split into men (blue) and women (red). PRS were generated at 8  $p$ -  
676 threshold levels using summary statistics from the Psychiatric Genetic Consortium

677 MDD GWAS (released July 2016) with the exclusion of Generation Scotland  
678 participants. The interaction effect was tested with **a**) the number of SLE reported  
679 (TSLE), **b**) “dependent” SLE (DSLE) and **c**) “independent” SLE (ISLE). In Colodro-Conde *et*  
680 *al.*, the variance of depression score explained in their sample by GxE was 0.12% ( $p = 7$   
681  $\times 10^{-3}$ ). GxE were also significant in women ( $p = 2 \times 10^{-3}$ ) explaining up to 0.25% of  
682 depression score variation, but not in men ( $p = 0.059$ ;  $R^2 = 0.17\%$ ; negative/protective  
683 effect on depression score).

684 **Figure 3.** Scatterplot of *diathesis-stress* interactions on depression score. Interactions  
685 with PRS at which nominally significant GxE effects were detected in **a**) full cohort ( $p$ -  
686 threshold = 0.01) and **b**) in women ( $p$ -threshold =  $1 \times 10^{-5}$ ) are shown. At bottom, the  
687 remaining samples (i.e., *full cohort, women or men*) at same  $p$ -threshold are shown for  
688 comparison. The X-axis represents the direct effect of PRS (standard deviation from  
689 the mean) based on **a**)  $p$ -threshold = 0.01 and **b**)  $p$ -threshold =  $1 \times 10^{-5}$ , using the total  
690 number of SLE reported by each participant (dot) as environmental exposures at three  
691 SLE levels represented by colours. Blue: 0 SLE, “no stress”,  $n = 1\ 833/1\ 041/792$ ; green:  
692 1 or 2 SLE, “low stress”,  $n = 2\ 311/1\ 459/852$ ; red: 3 or more SLE, “high stress”,  $n =$   
693  $775/490/285$ ; in the full cohort, women and men, respectively. Y-axis reflects the  
694 depression score standardized to mean of 0 and standard deviation of 1. Lines  
695 represent the increment in risk of depression under a certain degree of “stress”  
696 dependent on a genetic predisposition (= *diathesis*).

697

**Table 1. Diathesis effect on depression score under SLE categories.** Reported values at  $p$ -thresholds where nominally significant GxE effects were detected.

| PRS at $p$ value threshold = 0.01                 |               |               |                       |                |               |               |               |               |               |
|---------------------------------------------------|---------------|---------------|-----------------------|----------------|---------------|---------------|---------------|---------------|---------------|
| Sample                                            | *FULL COHORT  |               |                       | WOMEN          |               |               | MEN           |               |               |
| SLE category                                      | none          | low           | high                  | none           | low           | high          | none          | low           | high          |
| N                                                 | 1833          | 2311          | 775                   | 1041           | 1459          | 490           | 792           | 852           | 285           |
| Effect                                            | 0.021         | 0.043         | 0.142                 | 0.0118         | 0.0617        | 0.1538        | 0.0346        | 0.0113        | 0.1227        |
| s.e.                                              | 0.022         | 0.021         | 0.039                 | 0.029          | 0.027         | 0.049         | 0.034         | 0.032         | 0.063         |
| t                                                 | 0.957         | 2.07          | 3.644                 | 0.403          | 2.274         | 3.112         | 1.021         | 0.348         | 1.947         |
| $p$ value                                         | 0.339         | 0.039         | 2.86x10 <sup>-4</sup> | 0.687          | 0.023         | 0.002         | 0.307         | 0.728         | 0.053         |
| CI (95%)                                          | -0.022, 0.065 | 0.002, 0.084  | 0.065, 0.218          | -0.046, 0.069  | 0.008, 0.115  | 0.057, 0.251  | -0.032, 0.101 | -0.052, 0.075 | -0.001, 0.247 |
| PRS at $p$ value threshold = 1 x 10 <sup>-5</sup> |               |               |                       |                |               |               |               |               |               |
| Sample                                            | FULL COHORT   |               |                       | *WOMEN         |               |               | MEN           |               |               |
| SLE category                                      | none          | low           | high                  | none           | low           | high          | none          | low           | high          |
| N                                                 | 1833          | 2311          | 775                   | 1041           | 1459          | 490           | 792           | 852           | 285           |
| Effect                                            | -0.0022       | 0.0032        | 0.0705                | -0.061         | 0.014         | 0.078         | 0.082         | -0.0176       | 0.0548        |
| s.e.                                              | 0.022         | 0.021         | 0.04                  | 0.029          | 0.027         | 0.049         | 0.034         | 0.033         | 0.07          |
| t                                                 | -0.098        | 0.153         | 1.76                  | -2.086         | 0.541         | 1.609         | 2.416         | -0.537        | 0.778         |
| $p$ value                                         | 0.922         | 0.878         | 0.079                 | 0.037          | 0.589         | 0.108         | 0.016         | 0.592         | 0.437         |
| CI (95%)                                          | -0.046, 0.041 | -0.037, 0.044 | -0.008, 0.149         | -0.119, -0.004 | -0.038, 0.066 | -0.017, 0.174 | 0.015, 0.149  | -0.082, 0.047 | -0.084, 0.193 |

\*Sample where nominally significant GxE was detected. SLE categories (number of SLE reported): 0 SLE = “none”, 1 or 2 SLE = “low”, and 3 or more SLE = “high”. In red, nominally significant effects. In bold red, robustly significant effect after conservative Bonferroni correction ( $p < 6.94 \times 10^{-4}$ ).

Figure 1.

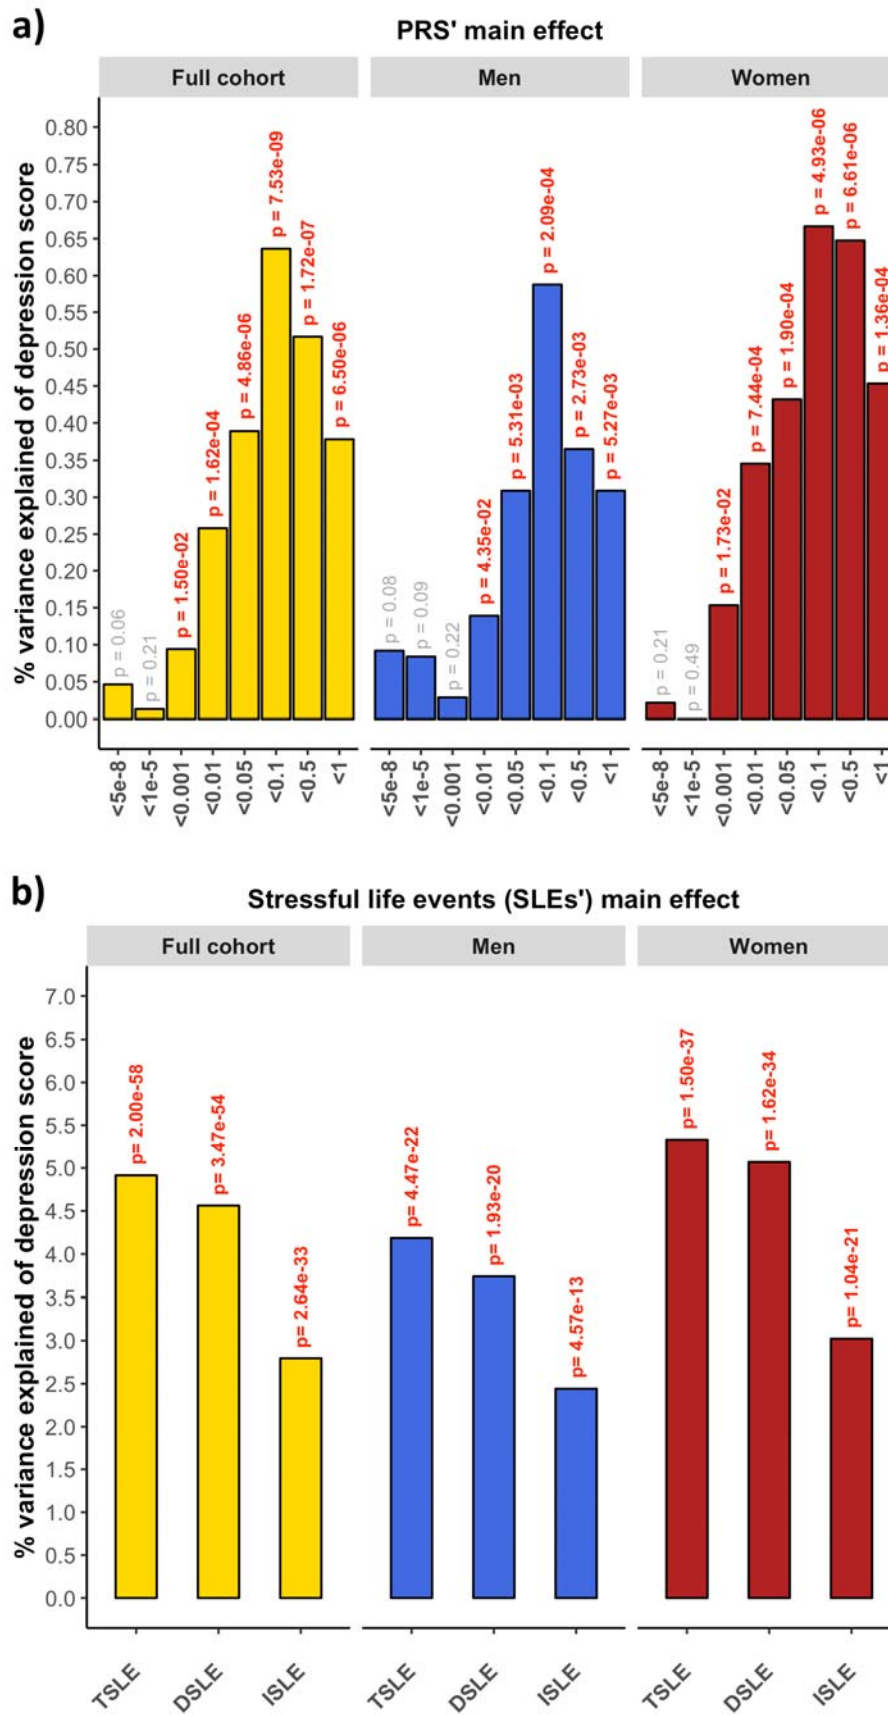

Figure 2.

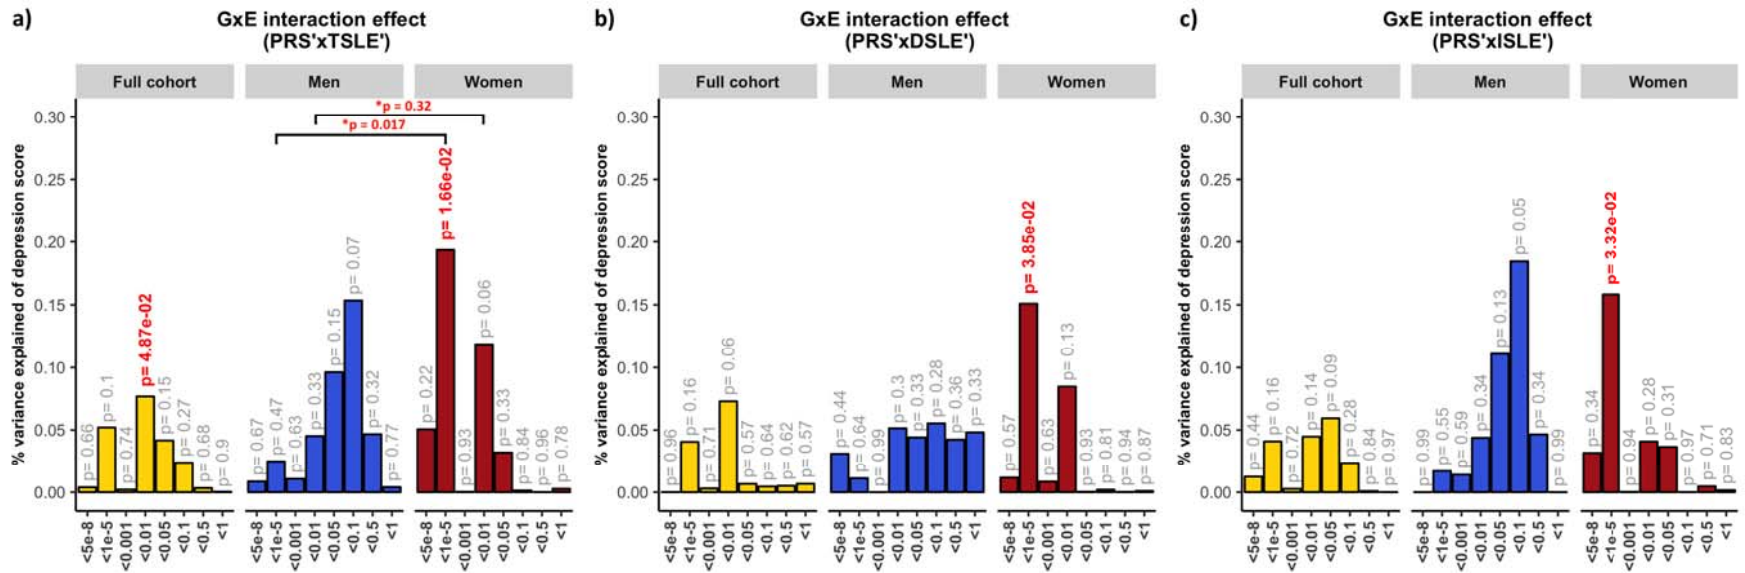

Figure 3.

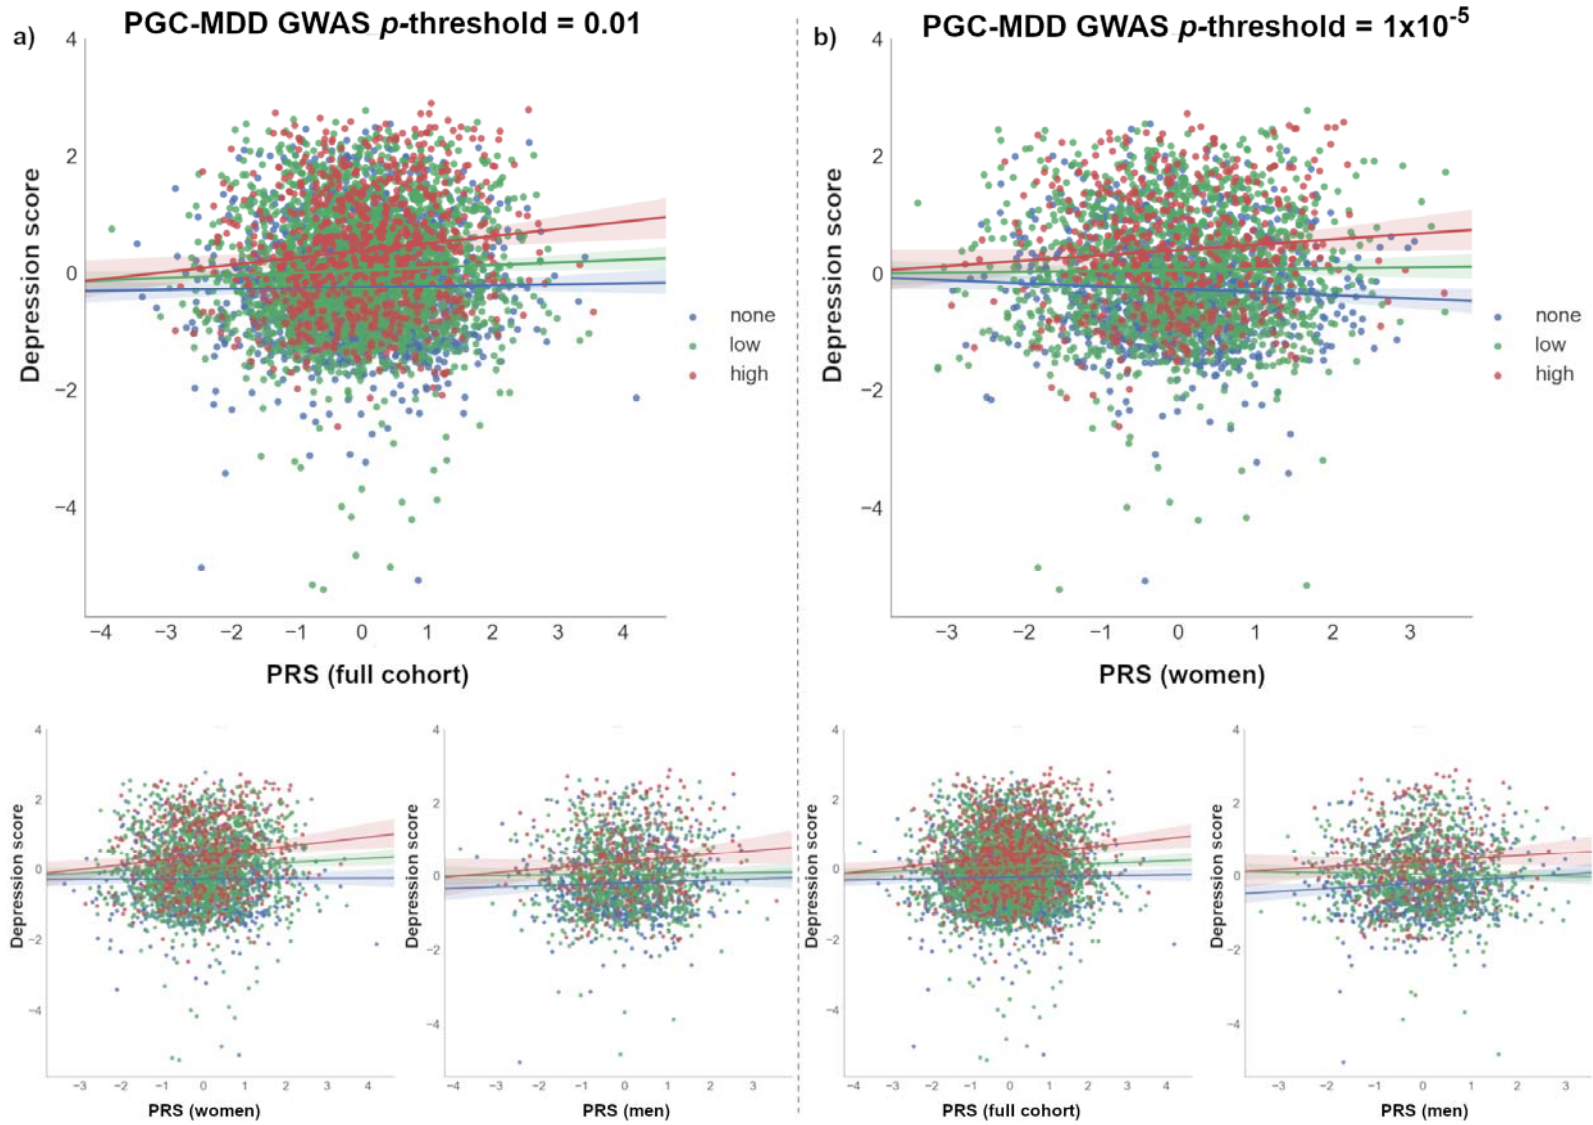

Source: https://www.biorxiv.org/content/early/2018/11/26/389494.full.pdf
